# Supplementary material for: An enhancer cluster controls gene activity and topology of the SCN5A-SCN10A locus in vivo
Source: PubMed Central journal article supplement (PMC6821807; doi:10.1038/s41467-019-12856-5), 2019-10-30
Supplement: 41467_2019_12856_MOESM2_ESM.pdf [file 41467_2019_12856_MOESM2_ESM.pdf]

*An enhancer cluster controls gene activity and topology of the SCN5A-SCN10A locus in vivo*

Man et al.

**Supplementary Information**

**a**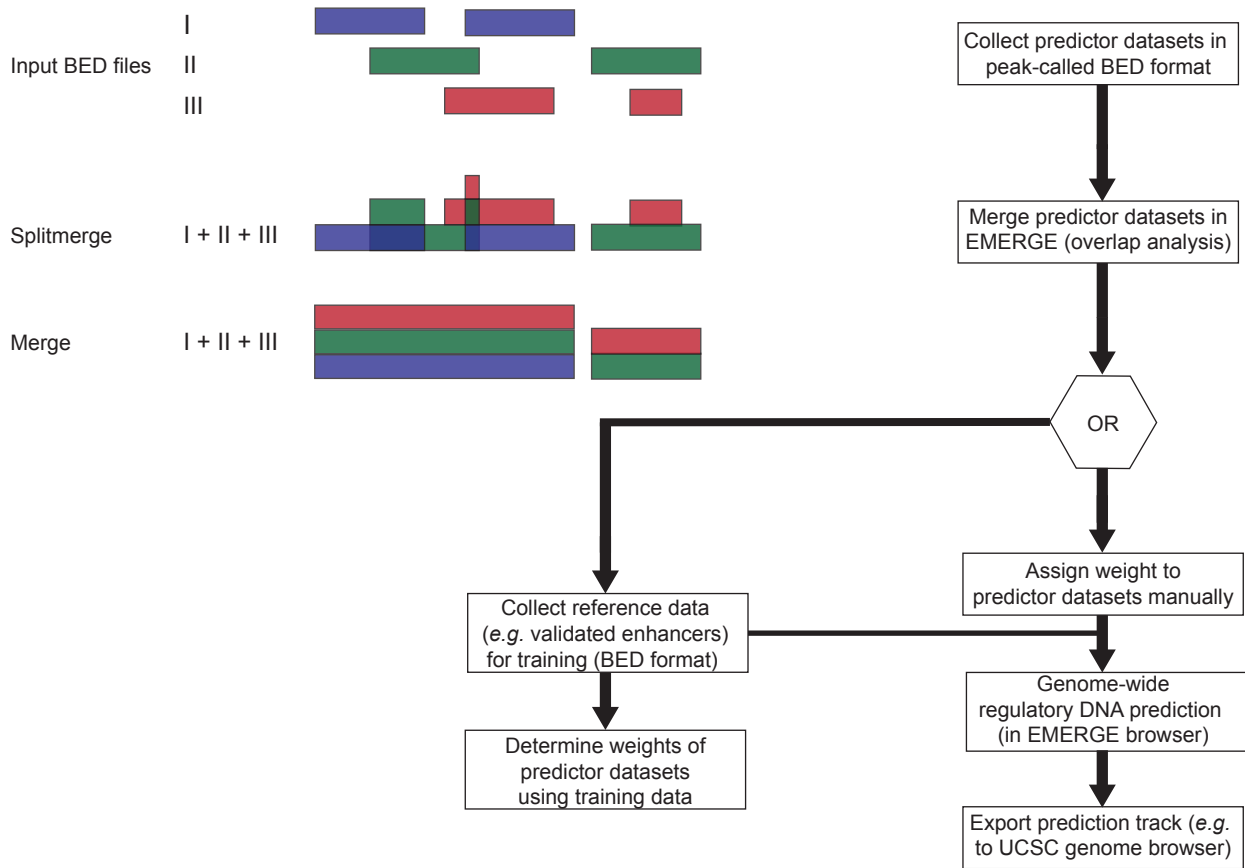**b**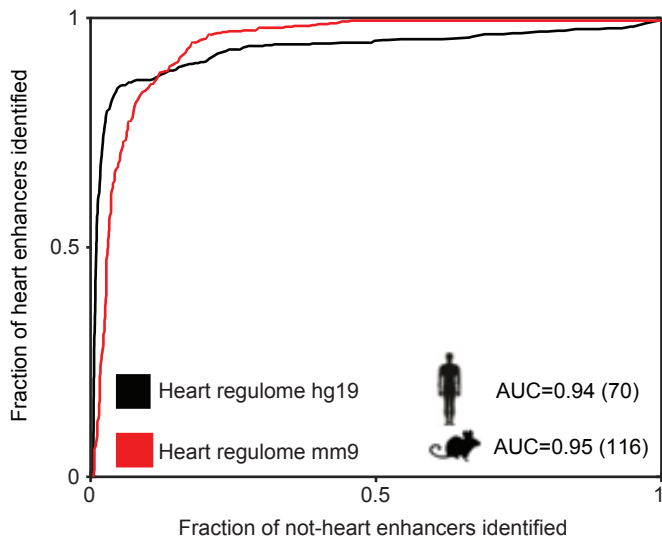

**Supplementary Figure 1.** Overview of the EMERGE framework. **a** The EMERGE flowchart, including the collecting and merging of input BED files, the assignment of dataset weights for prediction and the possibility to export the resulting prediction tracks. **b** Plotted Receiver operating characteristic (ROC) curves belonging to the mouse and human heart regulome catalogues predicted using EMERGE. Area under the curve (AUC) values are given for each ROC curve. The number of functional genomic predictor datasets used for the predictions is given in brackets. Predictions were generated using a subset of a set of highly active human and mouse heart validated heart enhancers ( $n=84$  for both) from the VISTA enhancer repository<sup>1</sup> to train EMERGE. Different subsets of the same enhancer sets were subsequently sub-sampled for testing to construct ROC curves, as described in the original EMERGE paper<sup>2</sup>.

**a**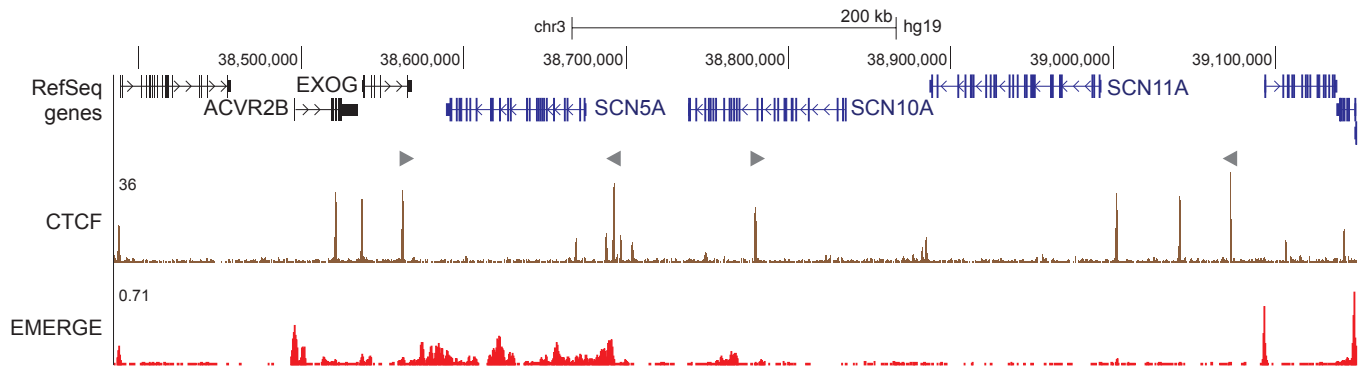**b**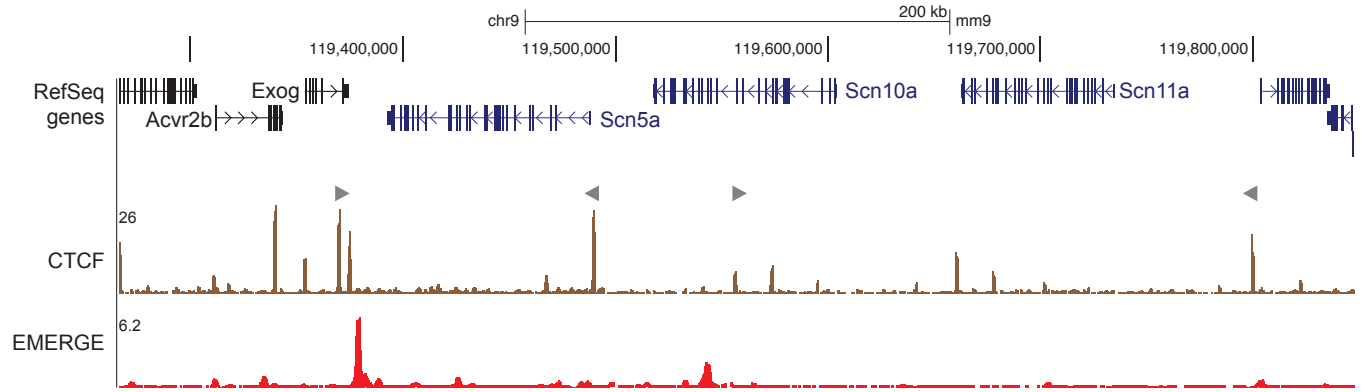

**Supplementary Figure 2.** CTCF-mediated chromatin loops in the human *SCN5A-SCN10A* locus and mouse *Scn5a-Scn10a* locus. **a, b** Human *SCN5A-SCN10A* locus (**a**) and mouse *Scn5a-Scn10a* locus (**b**) showing the forward and reverse orientation of conserved CTCF sites (grey triangles). The *SCN5A/Scn5a* TAD is confined between convergent CTCF sites. RE6-9 and the *SCN5A/Scn5a* promoter are flanked by convergent CTCF sites. Underneath human and mouse EMERGE.

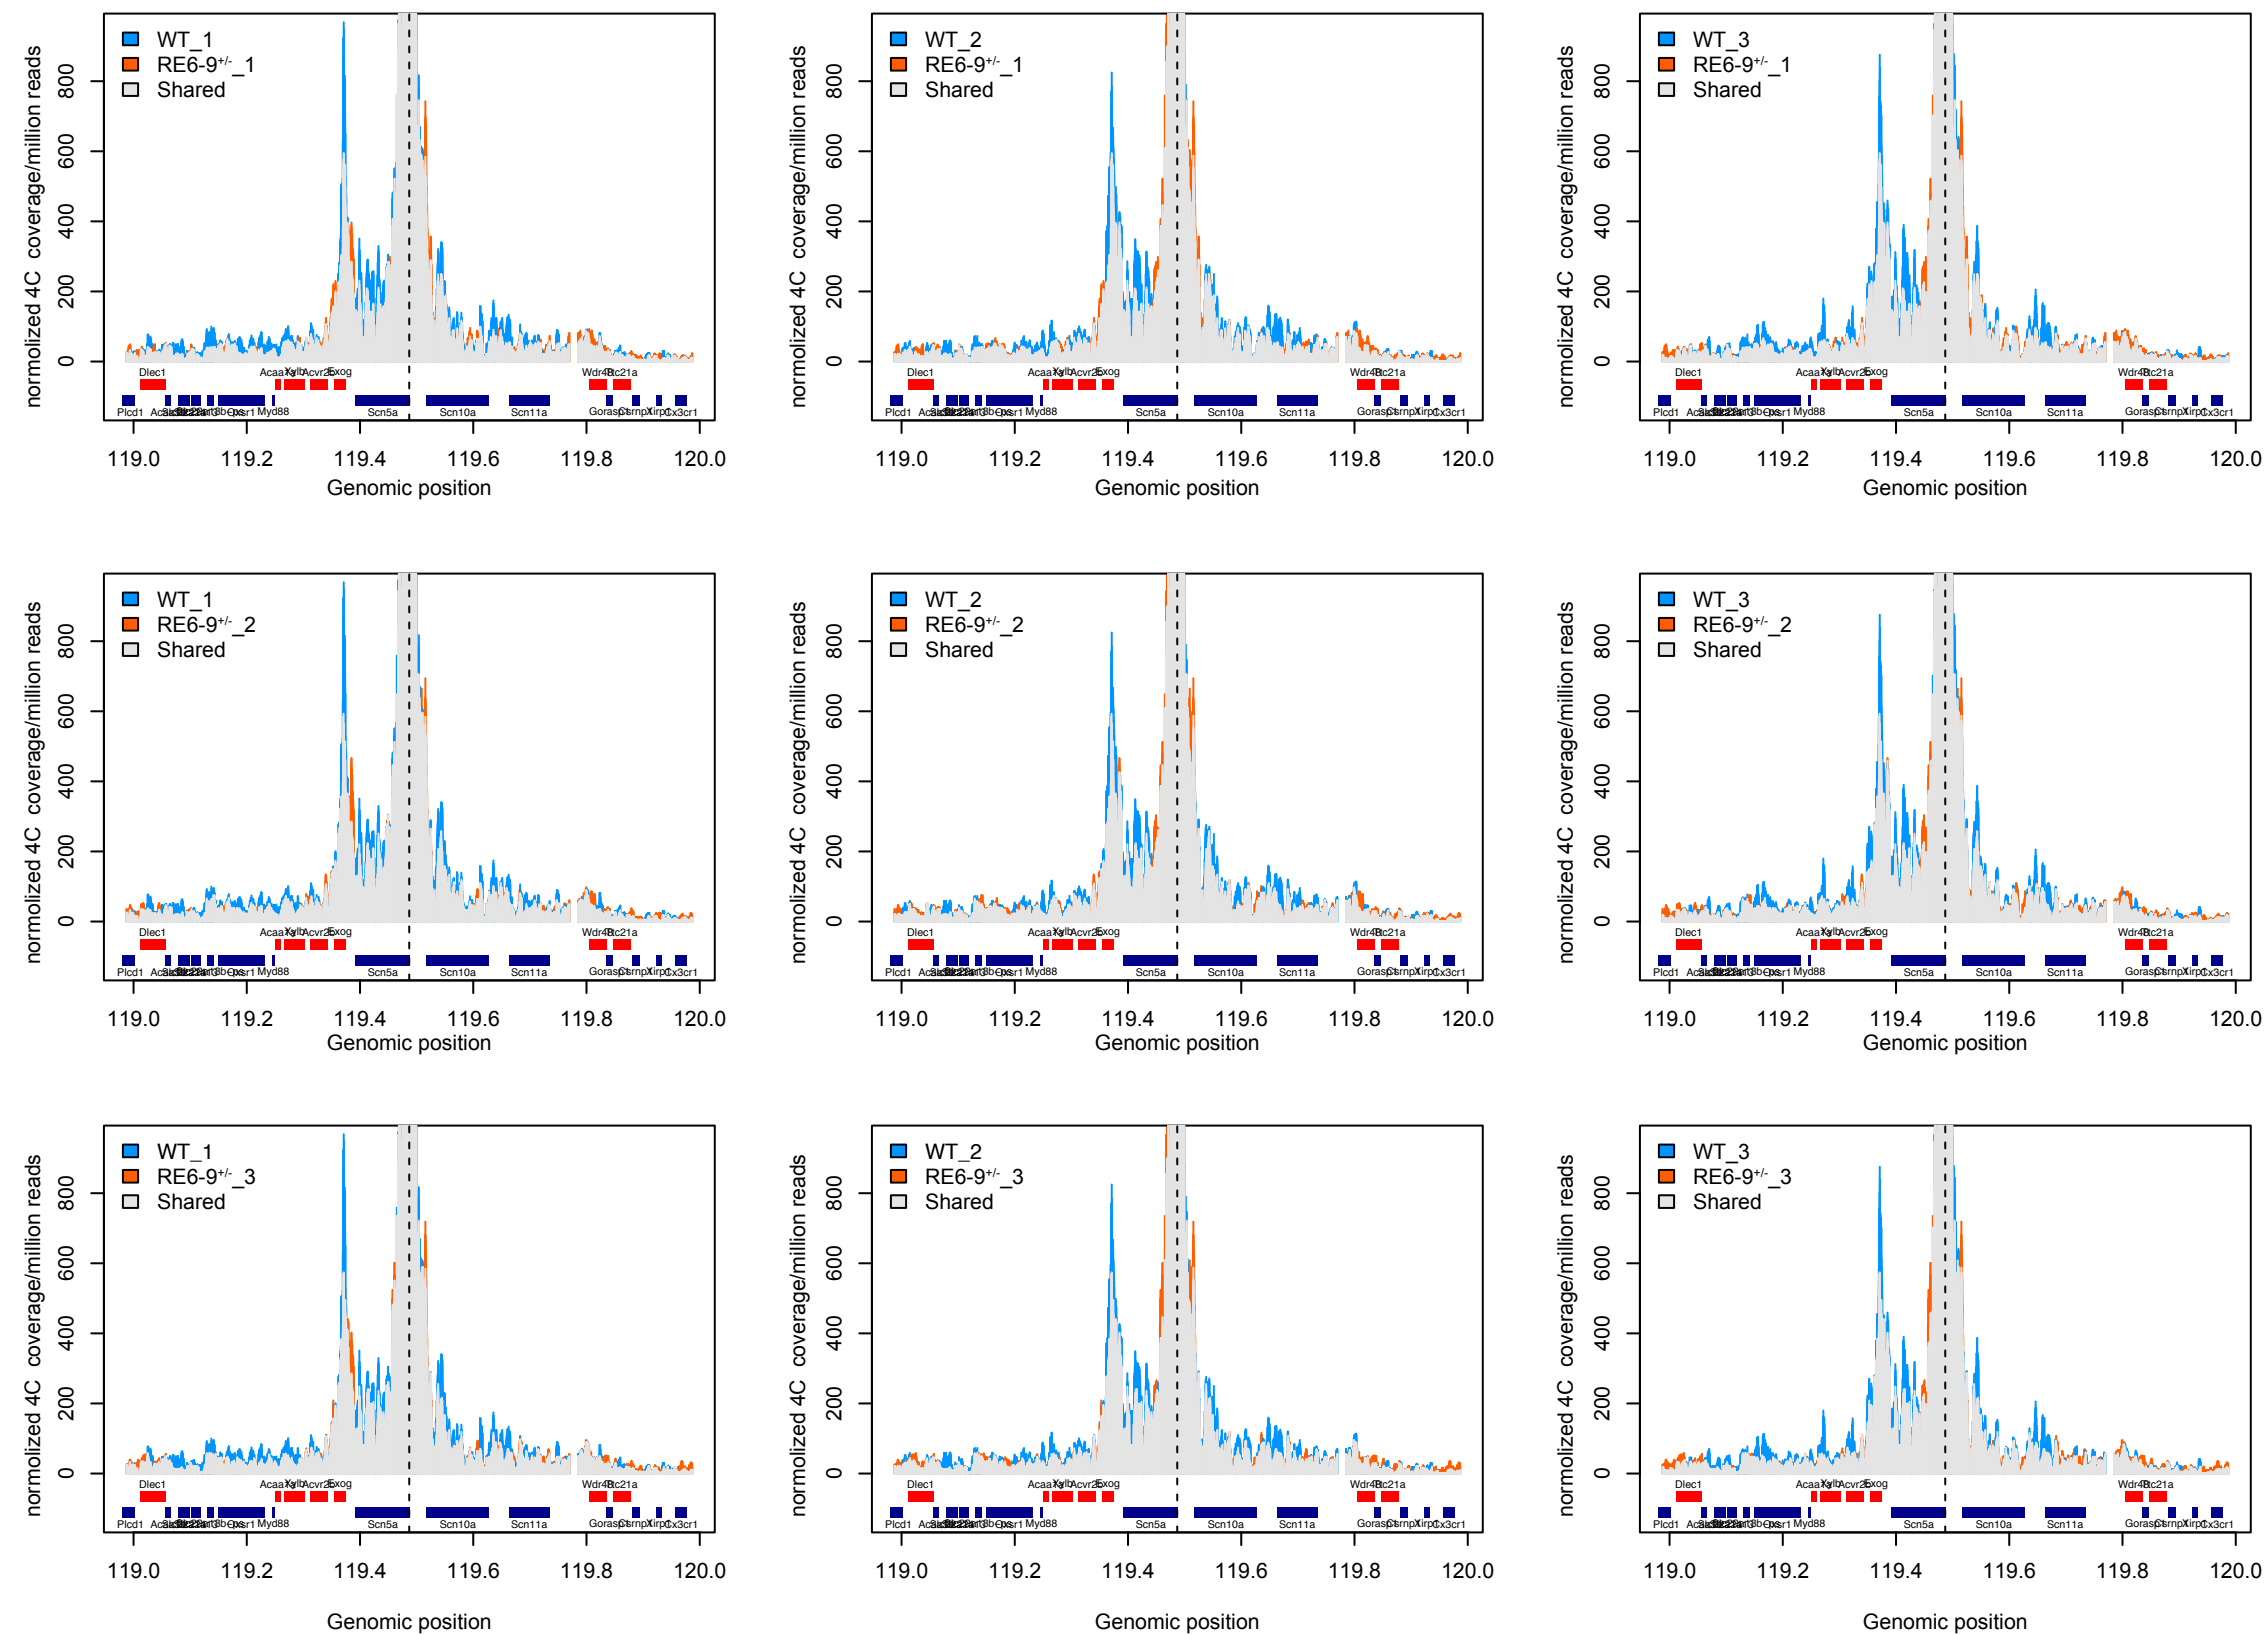

**Supplementary Figure 3.** Overlay of 4C contact profiles per replicate from viewpoint *Scn5a* promoter. 4C contact profiles showing the overlay for each combination per RE6-9<sup>+/−</sup> replicate (n=3) with wildtype (n=3). Upper panel = RE6-9<sup>+/−</sup>\_1; middle panel = RE6-9<sup>+/−</sup>\_2; bottom panel = RE6-9<sup>+/−</sup>\_3. Blue signal = WT; orange signal = RE6-9<sup>+/−</sup>; grey signal = shared.

**a**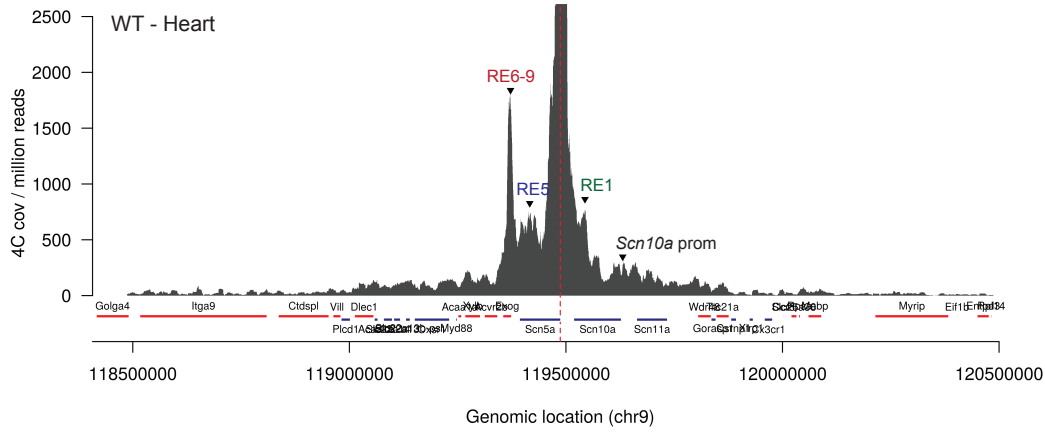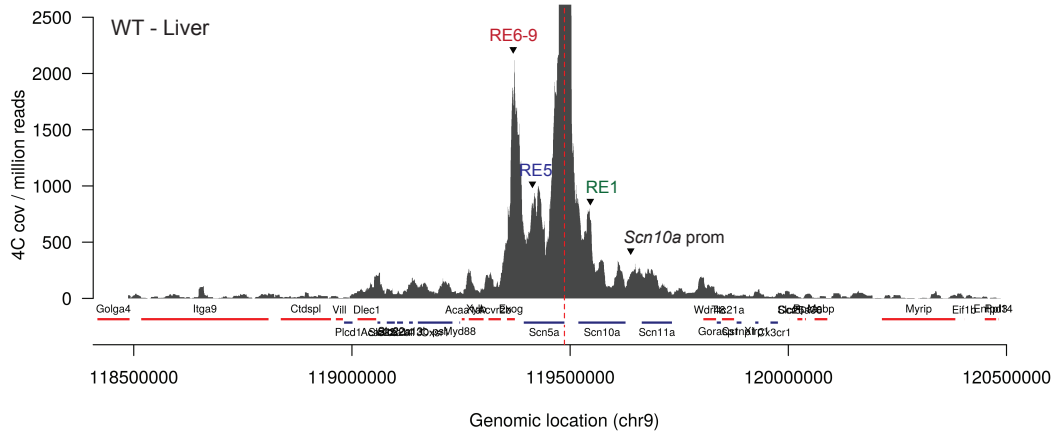**b**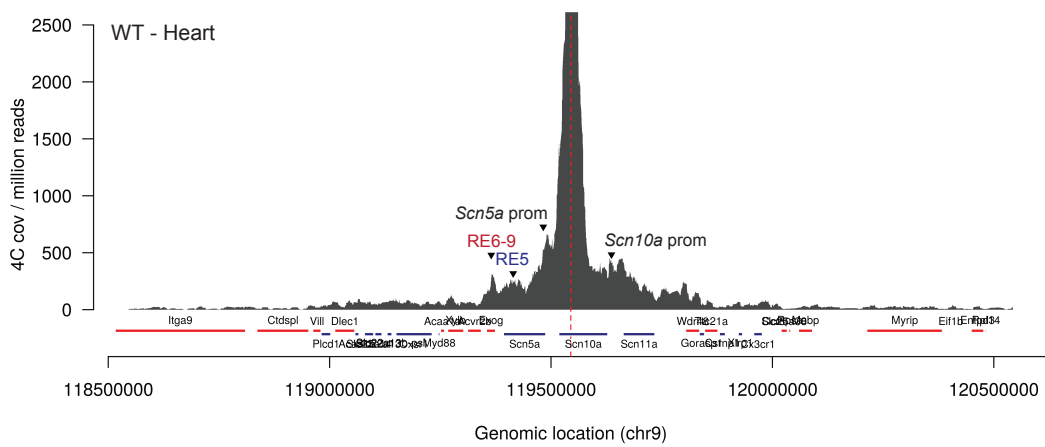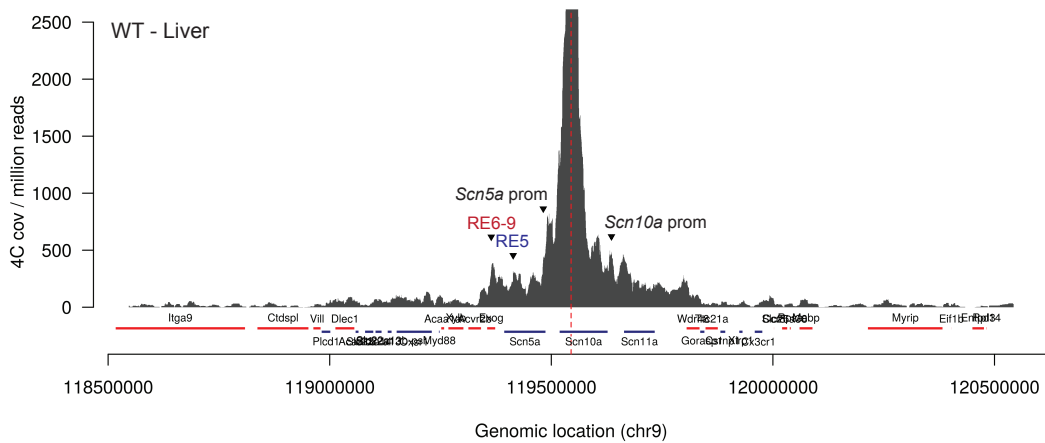

**Supplementary Figure 4.** The three-dimensional organization of the *Scn5a*-*Scn10a* in liver. **a, b** Shown a typical example of 4C contact profiles of wildtype heart (n=3) versus liver (n=3) for *Scn5a* promoter (**a**) viewpoint and RE1 viewpoint (**b**).

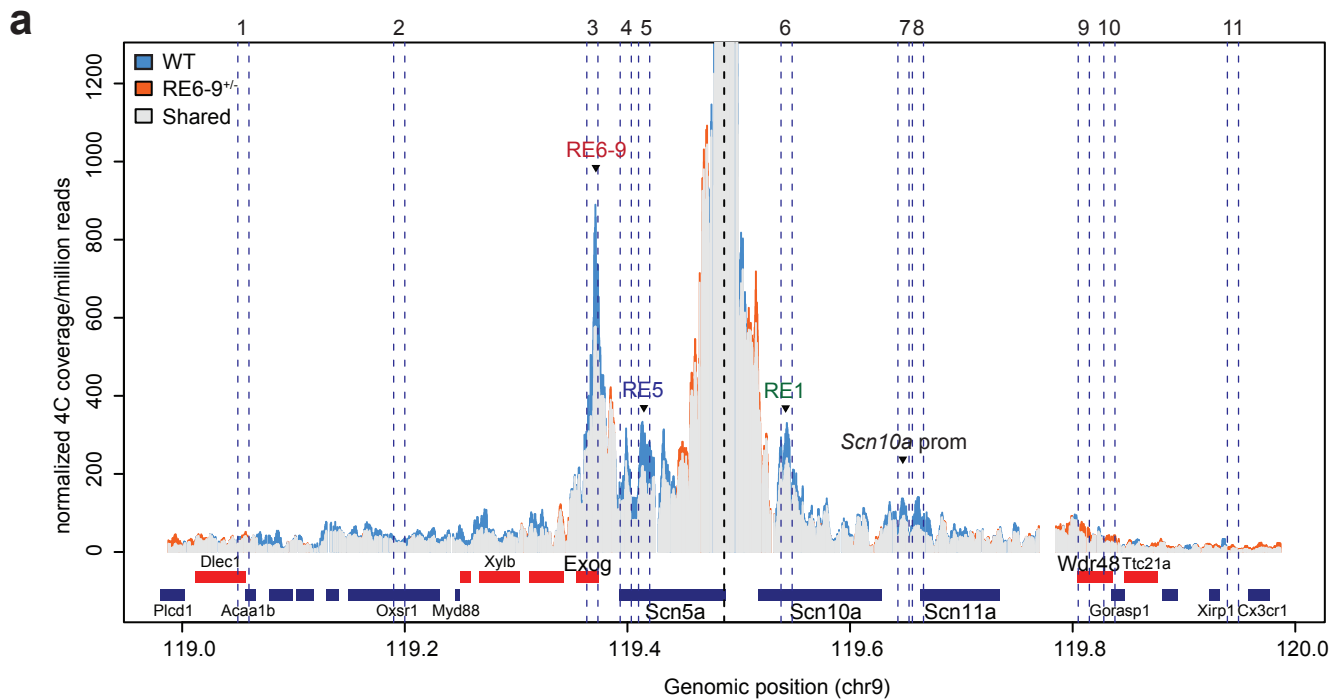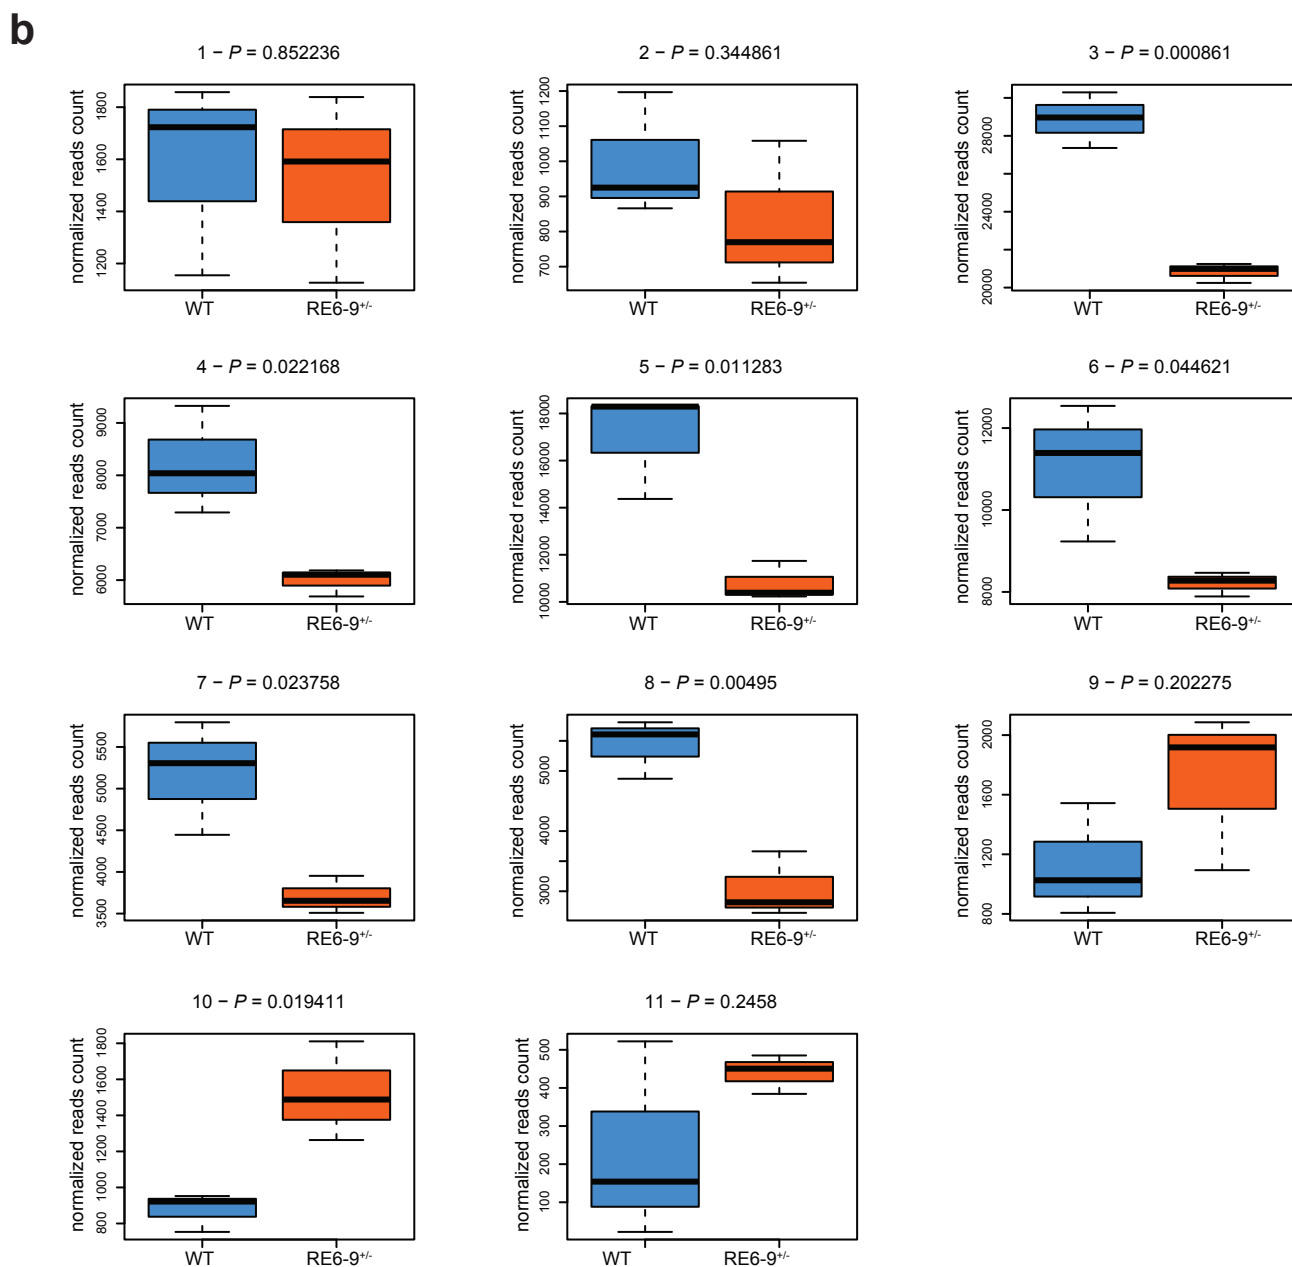

**Supplementary Figure 5.** Statistical analysis of 4C contact profiles from viewpoint bait *Scn5a* promoter. **a** Genomic locations in the *Scn5a-Scn10a* tested for difference in mean in contact profiles: 1. 119055000, 2. 119195000, 3. 119368500, 4. 119398500, 5. 119415000, 6. 119543000, 7. 119648000, 8. 119661000, 9. 119810000, 10. 119833000, 11. 119944000. **b** Boxplots showing the difference in normalized reads count per measured anchor.  $P$  values were calculated using unpaired Student's  $t$ -test. 3 = RE6-9; 5 = RE5; 6 = RE1; 7/8 = *Scn10a* promoter.

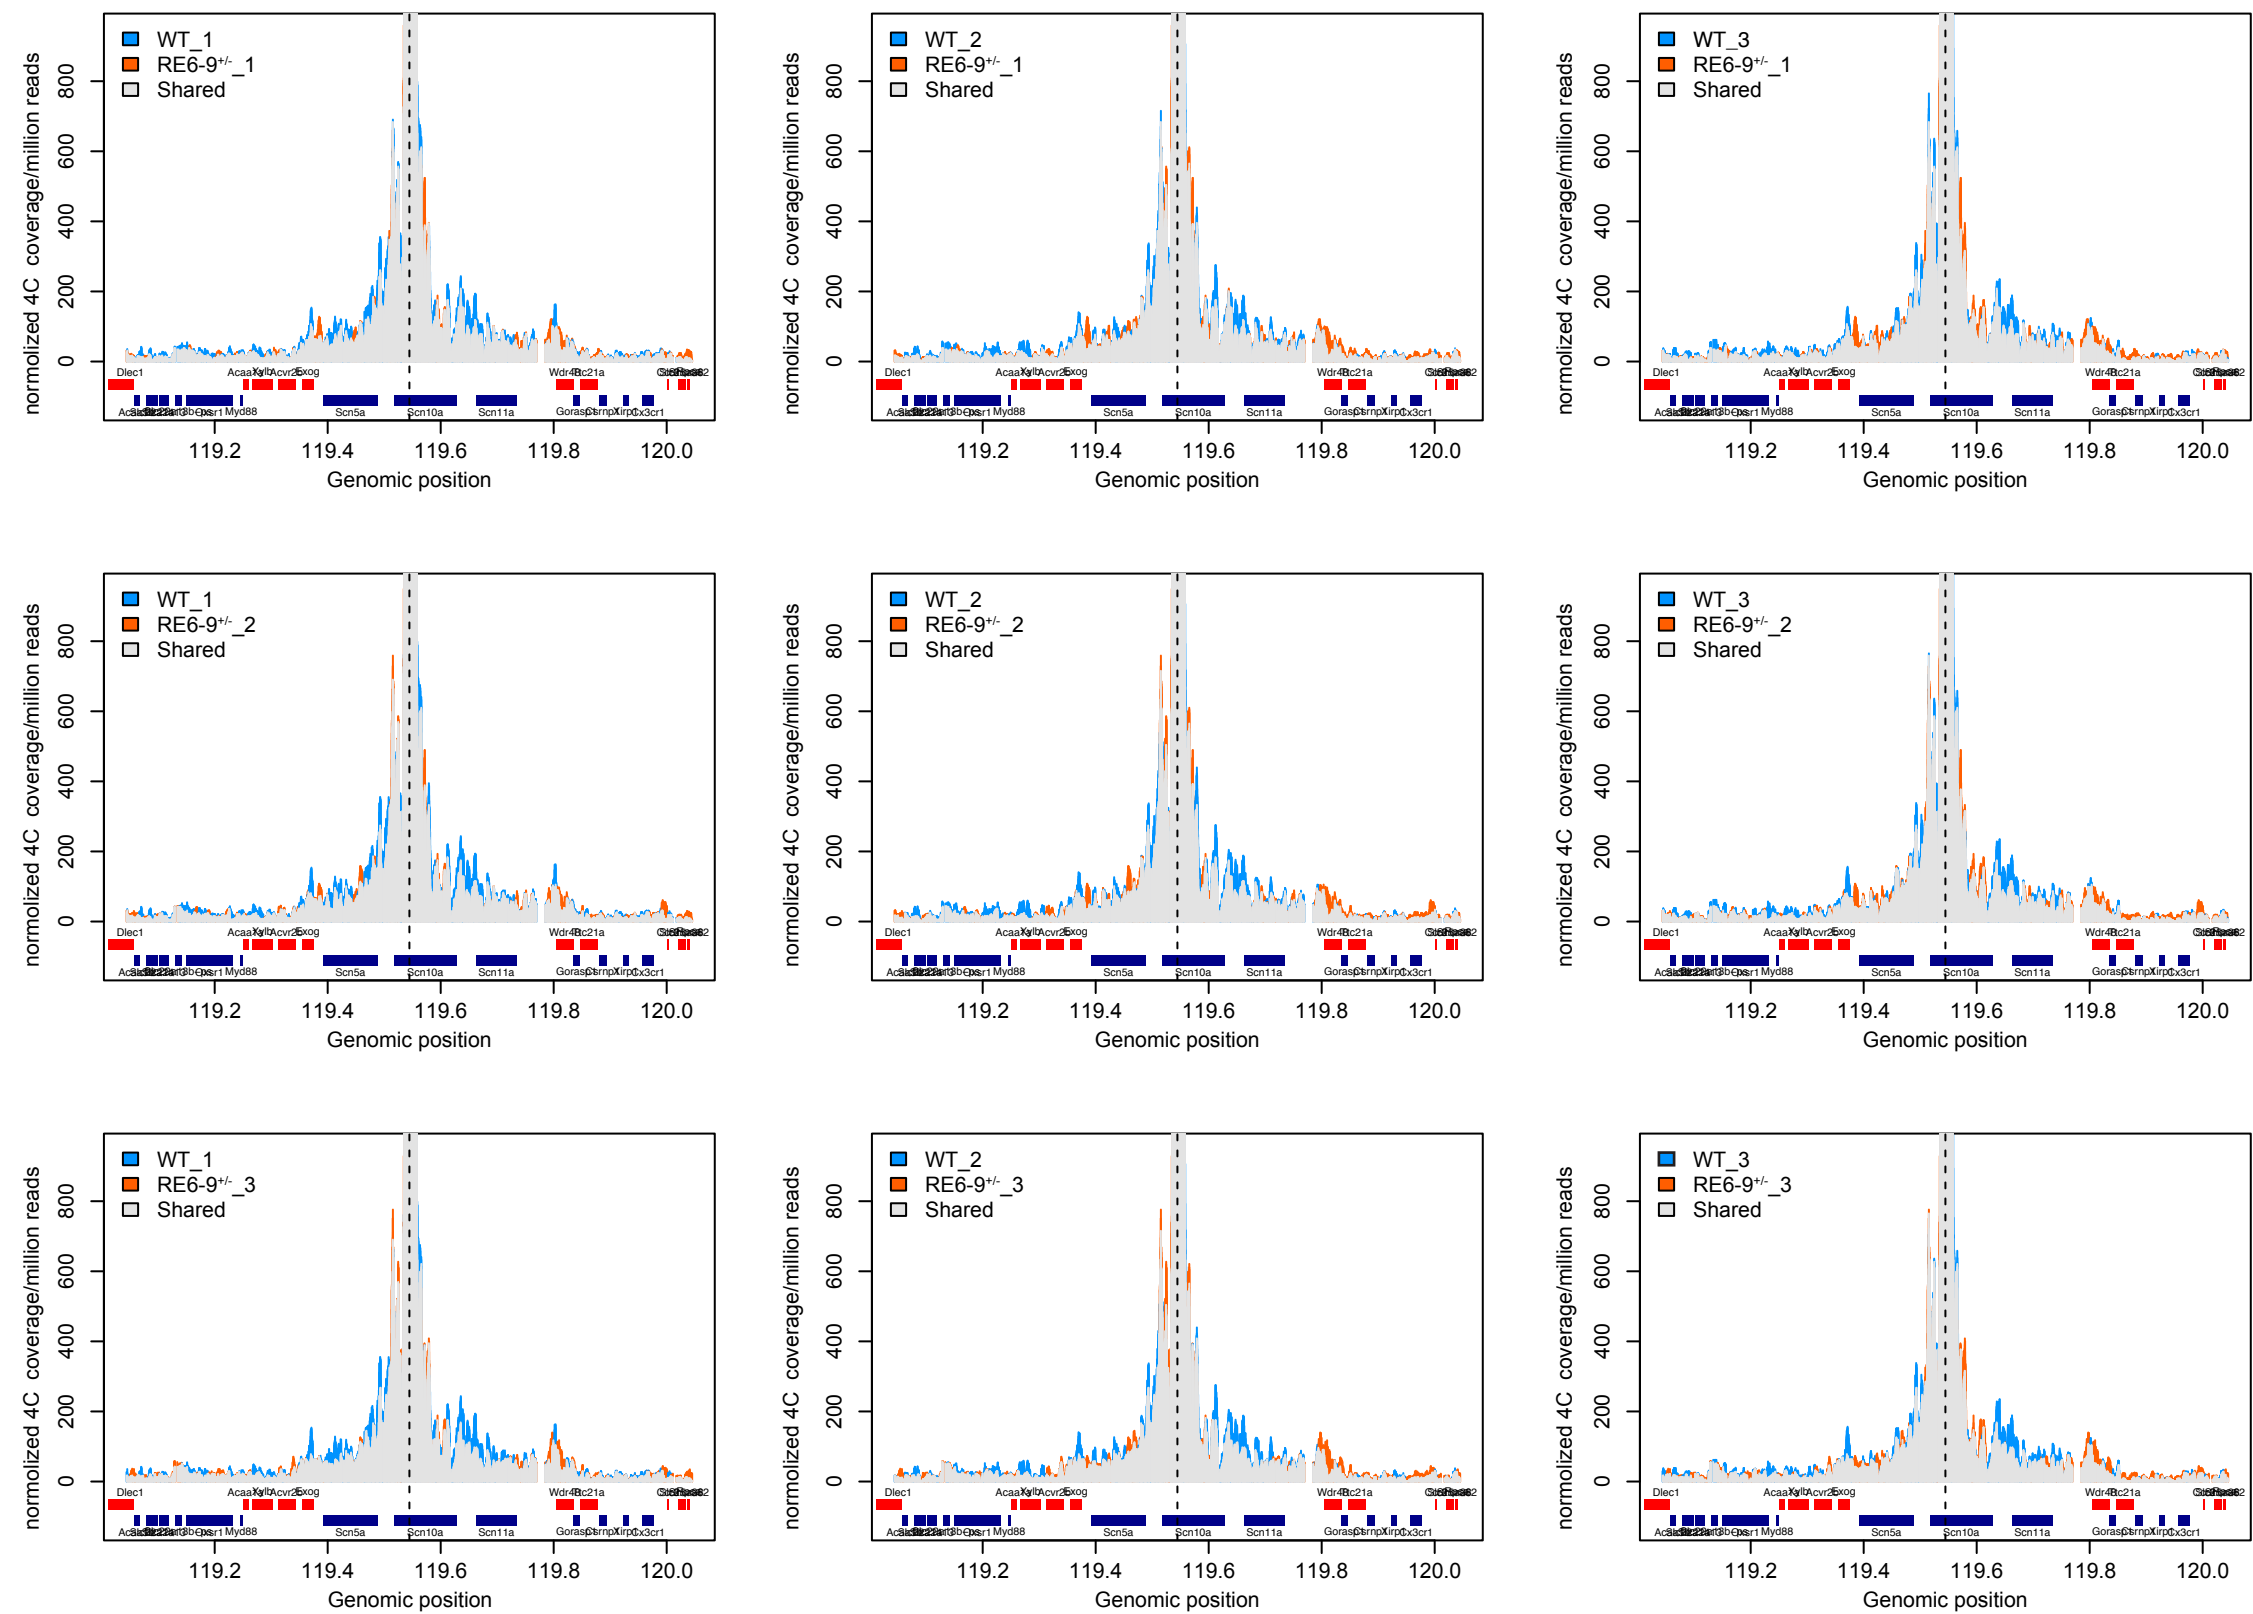

**Supplementary Figure 6.** Overlay of 4C contact profiles per replicate from viewpoint RE1. 4C contact profiles showing the overlay for each combination per RE6-9<sup>+/.</sup> replicate (n=3) with wildtype (n=3). Upper panel = RE6-9<sup>+/.</sup>\_1; middle panel = RE6-9<sup>+/.</sup>\_2; bottom panel = RE6-9<sup>+/.</sup>\_3. Blue signal = WT; orange signal = RE6-9<sup>+/.</sup>; grey signal = shared.

**a**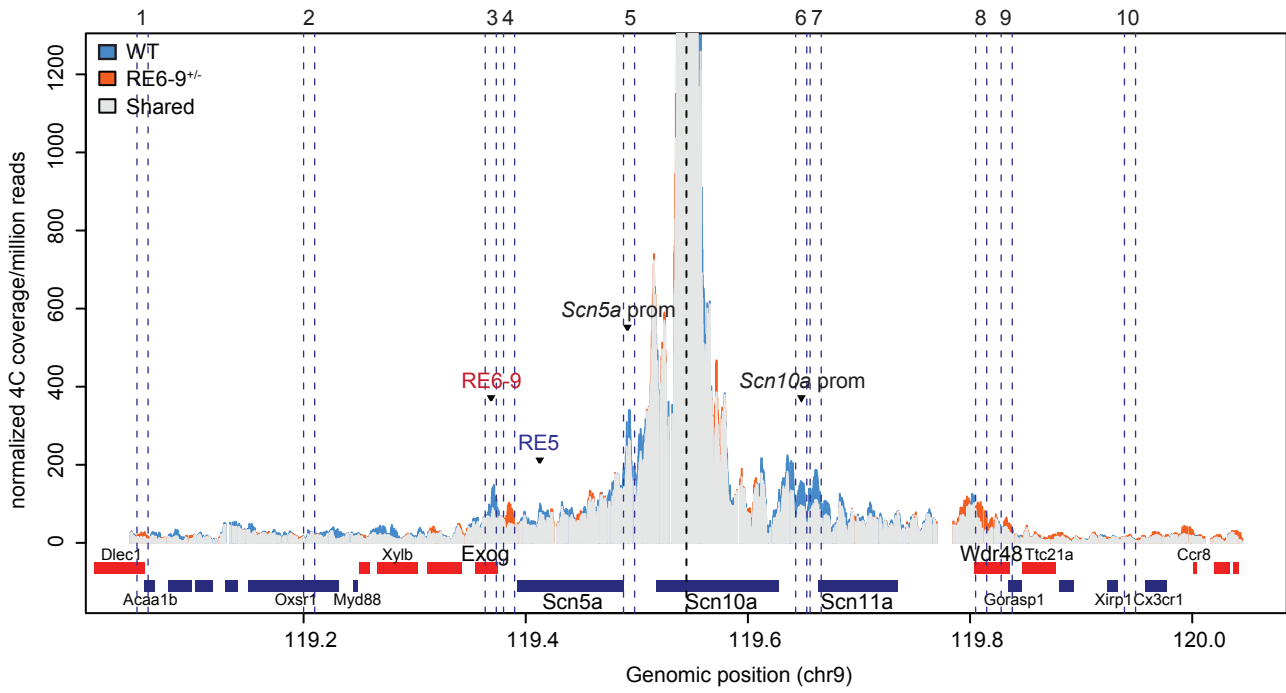**b**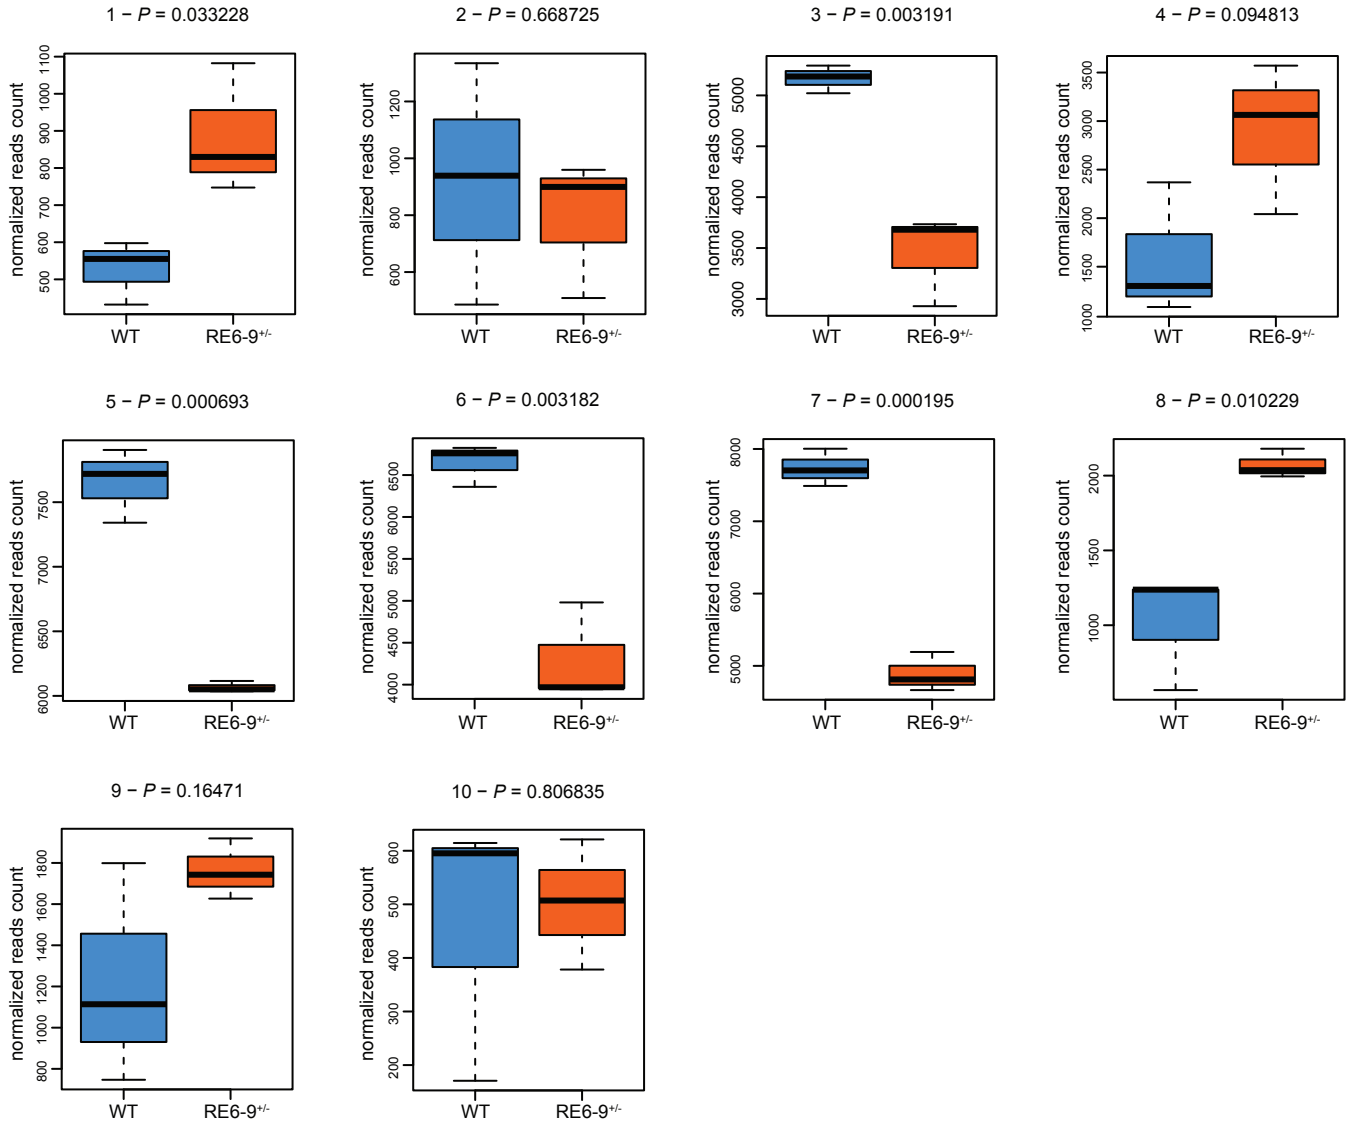

**Supplementary Figure 7.** Statistical analysis of 4C contact profiles from viewpoint bait RE1. **a** Genomic locations in the *Scn5a-Scn10a* tested for difference in mean in contact profiles: 1. 119055000, 2. 119205000, 3. 119368500, 4. 119385000, 5. 119493000, 6. 119648000, 7. 119661000, 8. 119810000, 9. 119833000, 10. 119944000. **b** Boxplots showing the difference in normalized reads count per measured anchor.  $P$  values were calculated using unpaired Student's  $t$ -test. 3 = RE6-9; 5 = *Scn5a* promoter; 6/7 = *Scn10a* promoter.



**a**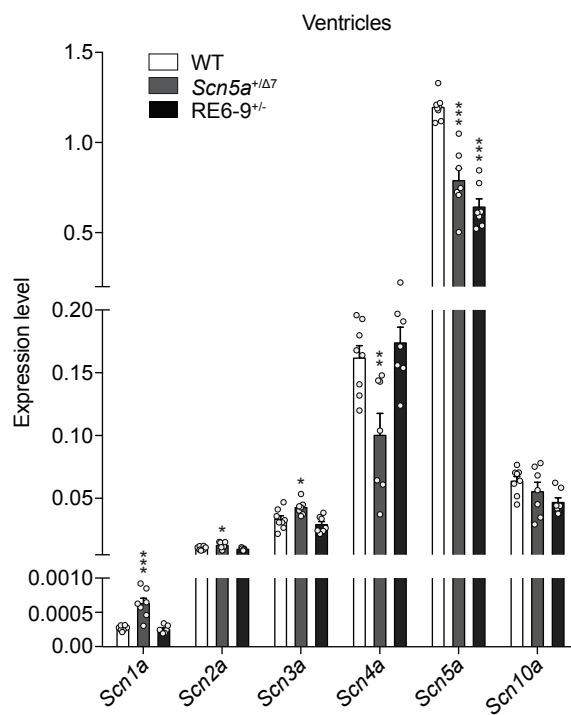**b**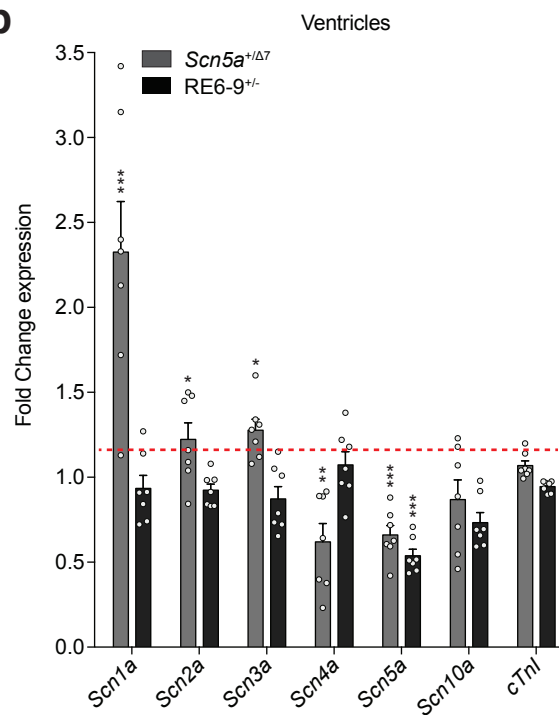

**Supplementary Figure 8.** Transcriptional adaptation of several sodium channel gene family members in heterozygous *Scn5a*<sup>+Δ7</sup> mice. **a, b** Absolute expression (**a**) and fold change expression (**b**) levels of *Scn1a*, *Scn2a*, *Scn3a*, *Scn4a*, *Scn5a* and *Scn10a* in ventricles from 8-week old *Scn5a*<sup>+Δ7</sup> and RE6-9<sup>+/-</sup> mice compared to wildtype (WT). Bars represent mean ± SEM and *P* values were calculated using one-way ANOVA with post-hoc Bonferroni tests. WT n=8; *Scn5a*<sup>+Δ7</sup> n=7; RE6-9<sup>+/-</sup> n=7. \**P* < 0.05; \*\**P* < 0.01; \*\*\**P* < 0.001. Source data are provided as a Source Data file.

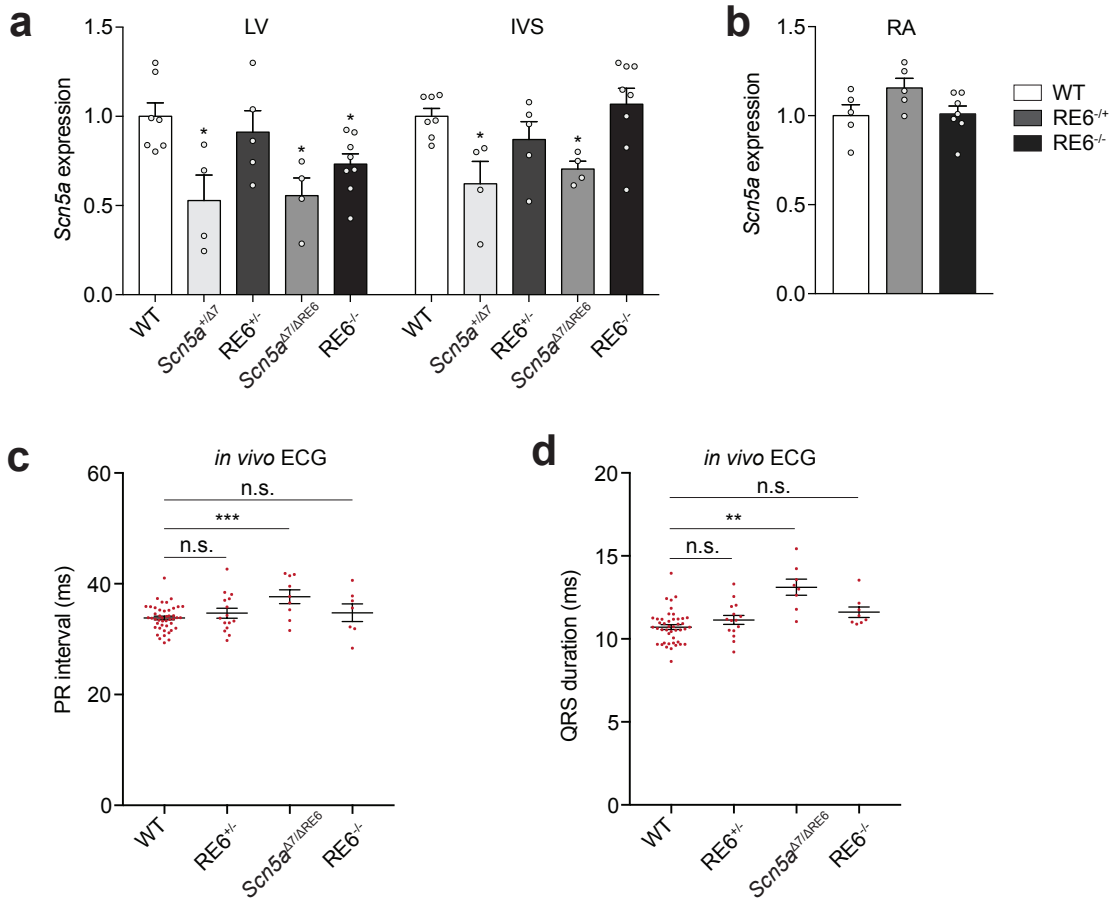

**Supplementary Figure 9.** Regulatory function of RE6 is minimal in *Scn5a* expression and function in the heart. **a** Fold change expression level of *Scn5a* from left ventricle and interventricular septum, and **b** right atrium of *Scn5a*<sup>+/ $\Delta$ 7, *RE6*<sup>+/-</sup>, *RE6*<sup>-/-</sup> and compound heterozygous *Scn5a* <sup>$\Delta$ 7/ $\Delta$ RE6 mutants. *P* values were calculated using one-way ANOVA with post-hoc Bonferroni tests. WT n=4; *Scn5a*<sup>+/ $\Delta$ 7 n=3; *RE6*<sup>+/-</sup> n=5; *Scn5a* <sup>$\Delta$ 7/ $\Delta$ RE6 n=4; *RE6*<sup>+/-</sup> n=8. \**P* < 0.05. **c, d** *in vivo* ECG analysis of *RE6*<sup>+/-</sup> and *RE6*<sup>-/-</sup> showing PR interval and QRS duration. *P* values were calculated using one-way ANOVA with post-hoc Bonferroni tests. WT n=44; *RE6*<sup>+/-</sup> n=15; *Scn5a* <sup>$\Delta$ 7/ $\Delta$ RE6 n=8; *RE6*<sup>-/-</sup> n=8. \*\**P* < 0.01; \*\*\**P* < 0.001; Bars represent mean  $\pm$  SEM; n.s. not significant. LV = left ventricle; IVS = interventricular septum; RA = right atrium. Source data are provided as a Source Data file.</sup></sup></sup></sup></sup>

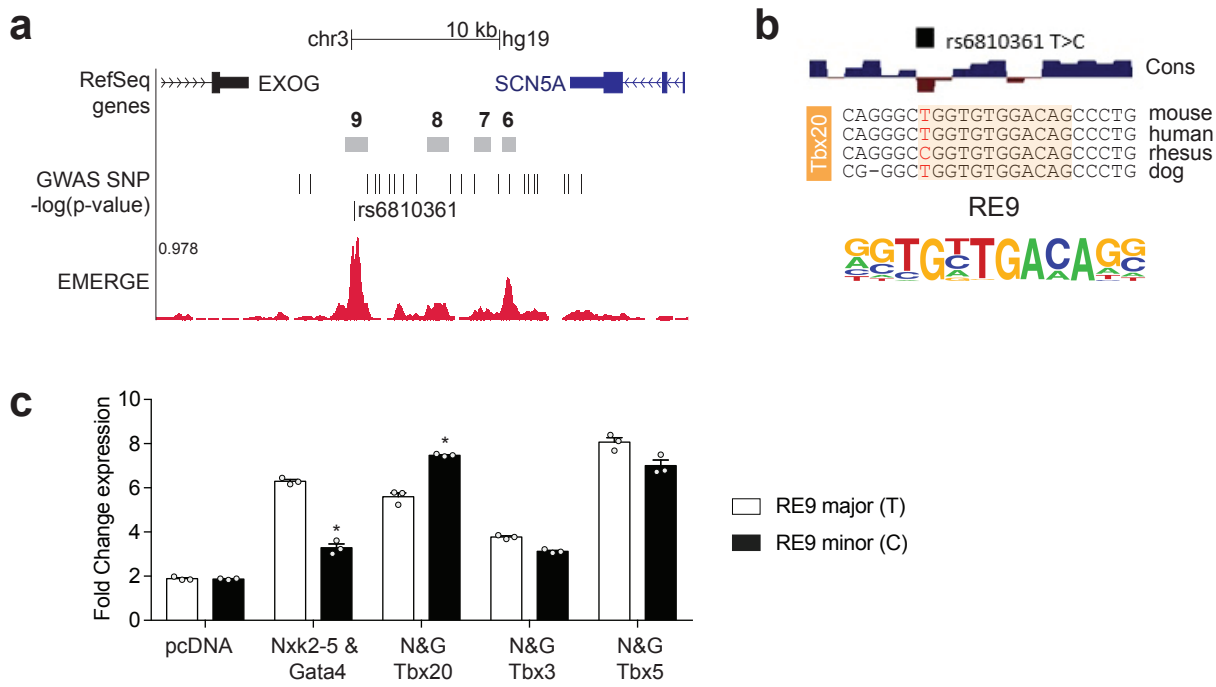

**Supplementary Figure 10.** A genetic variant affecting the activity of the enhancer cluster. **a** UCSC browser view of the enhancer cluster RE6-9 including QRS-associated genetic variant rs6810361 (T>C) positioned in RE9 and EMERGE. **b** rs6810361 (T>C, red) is located at the edge of a conserved Tbx20 binding site including sequence alignment between species and JASPAR consensus site **c** Luciferase activity assay in H10 cells. Addition of cardiac transcription factors Nkx2-5 and Gata4 causes strong reduction in RE9 activity for the minor allele. This effect is possibly rescued by Tbx20. Bars represent mean  $\pm$  SEM and  $P$  values were calculated using two-way ANOVA with post-hoc Bonferroni tests. Replicates  $n=3$ . \* $P < 0.05$ . Source data are provided as a Source Data file.

| Dataset          | Type                    | Genome | Tissue             | Overall   | Stage              | Source           | Deposit       | # of Peaks |
|------------------|-------------------------|--------|--------------------|-----------|--------------------|------------------|---------------|------------|
| Conservation     | PhastCons               | mm9    | all                | all       | all                | Siepel lab       | UCSC          | 972010     |
| CTCF             | ChIP-seq                | mm9    | heart              | heart     | adult              | Ren lab          | GSM918756     | 41866      |
| DHSs             | Dnase1 hypersensitivity | mm9    | whole_brain        | brain     | E18.5              | ENCODE           | GSE37074      | 143557     |
| H3K27ac          | ChIP-seq                | mm9    | whole_brain        | brain     | E14.5              | ENCODE           | GSE49847      | 34012      |
| H3K4me1          | ChIP-seq                | mm9    | whole_brain        | brain     | E14.5              | ENCODE           | GSE49847      | 152915     |
| H3K4me3          | ChIP-seq                | mm9    | whole_brain        | brain     | E14.5              | ENCODE           | GSE49847      | 36227      |
| Pol2             | ChIP-seq                | mm9    | whole_brain        | brain     | E14.5              | ENCODE           | GSE49847      | 17146      |
| Smarca4          | ChIP-seq                | mm9    | forebrain          | brain     | E11.5              | Pennacchio lab   | GSE37151      | 7349       |
| ATAC             | ATAC-seq                | mm9    | Ventricle          | heart     | E12.5              | Christoffels lab | in house      | 84667      |
| ATAC             | ATAC-seq                | mm9    | right atrium       | heart     | E12.5              | Christoffels lab | in house      | 129996     |
| ATAC             | ATAC-seq                | mm9    | left atrium        | heart     | E12.5              | Christoffels lab | in house      | 125461     |
| ATAC             | ATAC-seq                | mm9    | HL-1 cells         | heart     | no stimulation 20k | Christoffels lab | in house      | 110206     |
| ATAC             | ATAC-seq                | mm9    | HL-1 cells         | heart     | no stimulation 50k | Christoffels lab | in house      | 150324     |
| ATAC             | ATAC-seq                | mm9    | HL-1 cells         | heart     | Bmp2 stim 20k      | Christoffels lab | in house      | 150279     |
| ATAC             | ATAC-seq                | mm9    | HL-1 cells         | heart     | Bmp2 stim 50k      | Christoffels lab | in house      | 130868     |
| ATAC             | ATAC-seq                | mm9    | atria              | heart     | Embryonic          | Moskowitz        | unpublished   | 18213      |
| ATAC             | ATAC-seq                | mm9    | pSHF               | heart     | Embryonic          | Moskowitz        | unpublished   | 21318      |
| ATAC             | ATAC-seq                | mm9    | ventricles         | heart     | Embryonic          | Moskowitz        | unpublished   | 33418      |
| Coup-TFII        | ChIP-seq                | mm9    | atria              | heart     | E14.5              | Tsai lab         | GSE46497      | 4359       |
| DHSs             | Dnase1 hypersensitivity | mm9    | heart              | heart     | adult              | ENCODE           | GSE37074      | 150000     |
| Gata4            | ChIP-seq                | mm9    | heart              | heart     | adult              | Christoffels lab | GSE35151      | 150493     |
| Gata4            | ChIP-seq                | mm9    | heart              | heart     | E12.5              | Pu lab           | GSE52123      | 150033     |
| Gata4            | ChIP-seq                | mm9    | heart              | heart     | adult              | Pu lab           | GSE52123      | 150054     |
| Gata4            | ChIP-exo                | mm9    | myocyte cell line  | heart     | differentiated     | Bruneau lab      | GSE77548      | 25710      |
| Gata4            | ChIP-exo                | mm9    | myocyte cell line  | heart     | cardiac_precursor  | Bruneau lab      | GSE77548      | 52999      |
| H3ac             | ChIP-seq                | mm9    | left ventric~      | heart     | adult              | Baker lab        | GSE63590      | 150201     |
| H3K27ac          | ChIP-seq                | mm9    | avc                | heart     | E10.5              | Christoffels lab | GSE55611      | 87572      |
| H3K27ac          | ChIP-seq                | mm9    | right atrium       | heart     | E10.5              | Christoffels lab | GSE55611      | 67092      |
| H3K27ac          | ChIP-seq                | mm9    | heart              | heart     | adult              | ENCODE           | GSE49847      | 53034      |
| H3K27ac          | ChIP-seq                | mm9    | heart              | heart     | E14.5              | ENCODE           | GSE49847      | 84442      |
| H3K27ac          | ChIP-seq                | mm9    | heart              | heart     | adult              | Pennacchio lab   | GSE52386      | 150515     |
| H3K27ac          | ChIP-seq                | mm9    | heart              | heart     | E11.5              | Pennacchio lab   | GSE52386      | 32289      |
| H3K27ac          | ChIP-seq                | mm9    | heart              | heart     | E14.5              | Pennacchio lab   | GSE52386      | 31815      |
| H3K27ac          | ChIP-seq                | mm9    | heart              | heart     | E17.5              | Pennacchio lab   | GSE52386      | 23210      |
| H3K27ac          | ChIP-seq                | mm9    | heart              | heart     | P0                 | Pennacchio lab   | GSE52386      | 39133      |
| H3K27ac          | ChIP-seq                | mm9    | heart              | heart     | P7                 | Pennacchio lab   | GSE52386      | 36447      |
| H3K27ac          | ChIP-seq                | mm9    | heart              | heart     | P21                | Pennacchio lab   | GSE52386      | 7376       |
| H3K27me3         | ChIP-seq                | mm9    | heart              | heart     | adult              | ENCODE           | GSE49847      | 21876      |
| H3K4me1          | ChIP-seq                | mm9    | heart              | heart     | adult              | ENCODE           | GSE49847      | 150914     |
| H3K4me3          | ChIP-seq                | mm9    | heart              | heart     | adult              | ENCODE           | GSE49847      | 53034      |
| Hand2 (rep1)     | ChIP-seq                | mm9    | heart              | heart     | adult              | Zeller lab       | confidential? | 150002     |
| Hand2 (rep2)     | ChIP-seq                | mm9    | heart              | heart     | adult              | Zeller lab       | confidential? | 20446      |
| Hif1a rep1       | ChIP-seq                | mm9    | heart              | heart     | E12.5              | Keck institute   | GSE61247      | 17289      |
| Hopx             | ChIP-seq                | mm9    | heart              | heart     | E9.5               | Won lab          | GSE67251      | 3774       |
| Hopx with EGS    | ChIP-seq                | mm9    | heart              | heart     | E9.5               | Won lab          | GSE67251      | 178        |
| Isl1             | ChIP-seq                | mm9    | sinus node         | heart     | p3                 | Evans lab        | GSE68974      | 2322       |
| Mef2a            | ChIP-exo                | mm9    | C2C12 cell line    | heart     | myoblast           | McDermott lab    | GSE61204      | 2796       |
| Nkx2-5           | ChIP-seq                | mm9    | heart              | heart     | adult              | Christoffels lab | GSE35151      | 150227     |
| Nkx2-5           | ChIP-seq                | mm9    | heart              | heart     | E12.5              | Chen lab         | GSE70332      | 3967       |
| Nkx2-5           | ChIP-exo                | mm9    | myocyte cell line  | heart     | differentiated     | Bruneau lab      | GSE77548      | 62218      |
| Nkx2-5           | ChIP-exo                | mm9    | myocyte cell line  | heart     | cardiac_precursor  | Bruneau lab      | GSE77548      | 9463       |
| p300 (rep1)      | ChIP-seq                | mm9    | heart              | heart     | adult              | ENCODE           | GSE49847      | 137325     |
| p300 (rep2)      | ChIP-seq                | mm9    | heart              | heart     | adult              | ENCODE           | GSE49847      | 116158     |
| Pol2             | ChIP-seq                | mm9    | heart              | heart     | adult              | ENCODE           | GSE49847      | 58637      |
| RBFox2           | ChIP-seq                | mm9    | heart              | heart     | 9w                 | Palade lab       | GSE57926      | 151144     |
| Shox2            | ChIP-seq                | mm9    | heart              | heart     | E12.5              | Chen lab         | GSE70332      | x          |
| Smarca4          | ChIP-seq                | mm9    | heart              | heart     | E11.5              | Pennacchio lab   | GSE37151      | 13775      |
| SOX9             | ChIP-seq                | mm9    | AVC~               | heart     | E12.5              | Fox lab          | GSE73225      | x          |
| β-catenin biotin | ChIP-seq                | mm9    | mESC               | heart     | blastocyst         | McMahon lab      | GSE43565      | 20408      |
| β-catenin flag   | ChIP-seq                | mm9    | mESC               | heart     | blastocyst         | McMahon lab      | GSE43565      | 20294      |
| Suz12            | ChIP-seq                | mm9    | heart              | heart     | 9w                 | Palade lab       | GSE57926      | 22476      |
| Tbx20            | ChIP-seq                | mm9    | heart              | heart     | adult              | Evans lab        | GSE30943      | 4011       |
| TBX3             | ChIP-seq                | mm9    | heart              | heart     | adult              | Christoffels lab | GSE44821      | 150859     |
| Tbx5             | ChIP-seq                | mm9    | HL-1 cells         | heart     | cell line          | Pu lab           | GSE21529      | 48221      |
| Tbx5             | ChIP-exo                | mm9    | myocyte cell line~ | heart     | differentiated     | Bruneau lab      | GSE77548      | 45540      |
| Tbx5             | ChIP-exo                | mm9    | myocyte cell line~ | heart     | cardiac_precursor  | Bruneau lab      | GSE77548      | 8587       |
| Tcf3             | ChIP-seq                | mm9    | mESC               | heart     | blastocyst         | Whitehead Inst.  | GSE11724      | 7336       |
| Smarca4          | ChIP-seq                | mm9    | limb               | limb      | E11.5              | Pennacchio lab   | GSE37151      | 5251       |
| SOX9             | ChIP-seq                | mm9    | Limb               | limb      | E12.5              | Fox lab          | GSE73225      | 151213     |
| ATAC             | ATAC-seq                | mm9    | liver              | liver     | E12.5              | Christoffels lab | in house      | 70760      |
| Hey2             | ChIP-seq                | mm9    | mESC               | stem cell | blastocyst         | Gessler          | TBA           | 99750      |
| H3K27ac          | ChIP-seq                | mm9    | forebrain          | brain     | adult              | Pennacchio lab   | GSE52386      | 33178      |
| H3K27ac          | ChIP-seq                | mm9    | forebrain          | brain     | E11.5              | Pennacchio lab   | GSE52386      | 15823      |
| H3K27ac          | ChIP-seq                | mm9    | forebrain          | brain     | E14.5              | Pennacchio lab   | GSE52386      | 27288      |
| H3K27ac          | ChIP-seq                | mm9    | forebrain          | brain     | E17.5              | Pennacchio lab   | GSE52386      | 20450      |
| H3K27ac          | ChIP-seq                | mm9    | forebrain          | brain     | P0                 | Pennacchio lab   | GSE52386      | 30308      |
| H3K27ac          | ChIP-seq                | mm9    | forebrain          | brain     | P7                 | Pennacchio lab   | GSE52386      | 36771      |
| H3K27ac          | ChIP-seq                | mm9    | forebrain          | brain     | P21                | Pennacchio lab   | GSE52386      | 15246      |
| H3K27ac          | ChIP-seq                | mm9    | forelimb           | limb      | E11.5              | Menke lab        | GSE64055      | 40303      |
| H3K27ac          | ChIP-seq                | mm9    | hindlimb           | limb      | E11.5              | Menke lab        | GSE64055      | 35166      |
| Pol2             | ChIP-seq                | mm9    | limb               | limb      | E14.5              | ENCODE           | GSE49847      | 14426      |
| H3K4me1          | ChIP-seq                | mm9    | limb               | limb      | E14.5              | ENCODE           | GSE49847      | 150360     |
| H3K4me3          | ChIP-seq                | mm9    | limb               | limb      | E14.5              | ENCODE           | GSE49847      | 19259      |
| H3K27ac          | ChIP-seq                | mm9    | limb               | limb      | E14.5              | ENCODE           | GSE49848      | 30543      |
| DHSs             | Dnase1 hypersensitivity | mm9    | forelimb           | limb      | E11.5              | ENCODE           | GSE37074      | 151669     |
| DHSs             | Dnase1 hypersensitivity | mm9    | hindlimb           | limb      | E11.5              | ENCODE           | GSE37074      | 150814     |
| H3K27ac          | ChIP-seq                | mm9    | forebrain          | brain     | E12.5              | Rockowitz        | GSE66961      | 26863      |
| H3K4me1          | ChIP-seq                | mm9    | forebrain          | brain     | E12.5              | Rockowitz        | GSE66961      | 40773      |
| H3K4me3          | ChIP-seq                | mm9    | forebrain          | brain     | E12.5              | Rockowitz        | GSE66961      | 15407      |
| H3K27me3         | ChIP-seq                | mm9    | forebrain          | brain     | E12.5              | Rockowitz        | GSE66961      | 25473      |
| Pol2             | ChIP-seq                | mm9    | forebrain          | brain     | E12.5              | Rockowitz        | GSE66961      | 1704       |
| H3K4me1          | ChIP-seq                | mm9    | midbrain           | brain     | E11.5              | Endo             | GSE49652      | 19384      |
| H3K27ac          | ChIP-seq                | mm9    | midbrain           | brain     | E11.5              | Endo             | GSE49652      | 22752      |
| p300             | ChIP-seq                | mm9    | midbrain           | brain     | E11.5              | Pennacchio lab   | GSE22549      | 2786       |
| p300             | ChIP-seq                | mm9    | heart              | heart     | E11.5              | Pennacchio lab   | GSE22549      | 3597       |
| p300             | ChIP-seq                | mm9    | forebrain          | brain     | E11.5              | Pennacchio lab   | GSE13845      | 2454       |
| p300             | ChIP-seq                | mm9    | midbrain           | brain     | E11.5              | Pennacchio lab   | GSE13845      | 562        |
| p300             | ChIP-seq                | mm9    | limb               | limb      | E11.5              | Pennacchio lab   | GSE13845      | 2106       |
| DHSs             | Dnase1 hypersensitivity | mm9    | cerebellum         | brain     | P7                 | Crawford         | GSE60731      | 100000     |
| DHSs             | Dnase1 hypersensitivity | mm9    | cerebellum         | brain     | P14                | Crawford         | GSE60731      | 100000     |
| DHSs             | Dnase1 hypersensitivity | mm9    | cerebellum         | brain     | Adult              | Crawford         | GSE60731      | 100000     |
| DHSs             | Dnase1 hypersensitivity | mm9    | heart              | heart     | Adult              | Crawford         | GSE60731      | 100000     |
| Zic              | ChIP-seq                | mm9    | cerebellum         | brain     | P7                 | Crawford         | GSE60731      | 53761      |
| Zic              | ChIP-seq                | mm9    | cerebellum         | brain     | adult              | Crawford         | GSE60731      | 47573      |
| H3K27ac          | ChIP-seq                | mm9    | cerebellum         | brain     | adult              | Creyghton        | GSE67978      | 35904      |
| Smarca4          | ChIP-seq                | mm9    | hindbrain          | brain     | E11.5              | Pennacchio lab   | GSE37151      | 5461       |
| Ncoa1            | ChIP-seq                | mm9    | hindbrain          | brain     | E11.5              | Pennacchio lab   | GSE37151      | 1415       |
| Ncoa2            | ChIP-seq                | mm9    | hindbrain          | brain     | E11.5              | Pennacchio lab   | GSE37151      | 3445       |
| Smarca4          | ChIP-seq                | mm9    | midbrain           | brain     | E11.5              | Pennacchio lab   | GSE37151      | 1415       |
| Smarcc2          | ChIP-seq                | mm9    | hindbrain          | brain     | E11.5              | Pennacchio lab   | GSE37151      | 2273       |
| H3K4me1          | ChIP-seq                | mm9    | limb               | limb      | E11.5              | Pennacchio lab   | GSE37151      | 58181      |
| H3K4me3          | ChIP-seq                | mm9    | limb               | limb      | E11.5              | Pennacchio lab   | GSE37151      | 13137      |
| H3K27me3         | ChIP-seq                | mm9    | limb               | limb      | E11.5              | Pennacchio lab   | GSE37151      | 19668      |
| H3K27ac          | ChIP-seq                | mm9    | limb               | limb      | E11.5              | Pennacchio lab   | GSE37151      | 17118      |
| H3K4me1          | ChIP-seq                | mm9    | brain              | forebrain | E11.5              | Pennacchio lab   | GSE37151      | 34848      |
| H3K4me3          | ChIP-seq                | mm9    | brain              | forebrain | E11.5              | Pennacchio lab   | GSE37151      | 16544      |
| H3K27me3         | ChIP-seq                | mm9    | brain              | forebrain | E11.5              | Pennacchio lab   | GSE37151      | 11073      |

Supplemental Table 1. a Mouse functional genomic datasets included in merge as possible predictors

| Dataset      | Type                    | Genome | Tissue               | Stage                          | Source          | Deposit     | # of Peaks         |
|--------------|-------------------------|--------|----------------------|--------------------------------|-----------------|-------------|--------------------|
| Conservation | PhastCons               | hg19   | all                  | all                            | Siepel lab      | UCSC        | 10121233 (174584)* |
| CTCF         | ChIP-seq                | hg19   | HCM cells            | cell line                      | ENCODE          | GSE30263    | 41966              |
| DHSs         | Dnase1 hypersensitivity | hg19   | cerebellum           | adult                          | ENCODE          | GSE32970    | 104575             |
| DHSs         | Dnase1 hypersensitivity | hg19   | cerebrum             | adult                          | ENCODE          | GSE32970    | 135930             |
| DHSs         | Dnase1 hypersensitivity | hg19   | frontal_cortex       | adult                          | ENCODE          | GSE32970    | 110989             |
| DHSs         | Dnase1 hypersensitivity | hg19   | HCM cells            | cell line                      | ENCODE          | GSE26328    | 317895             |
| DHSs         | Dnase1 hypersensitivity | hg19   | heart                | adult                          | ENCODE          | GSE32970    | 124949             |
| H3K27ac      | ChIP-seq                | hg19   | brain                | fetal 12w post-gest.           | Guo lab         | GSE63634    | 77355              |
| H3K27ac      | ChIP-seq                | hg19   | cerebellum           | adult                          | Creyghton lab   | GSE40465    | 174090             |
| H3K27ac      | ChIP-seq                | hg19   | fibroblast cell line | induced myocytes D6            | Cao lab         | GSE78096    | 33954              |
| H3K27ac      | ChIP-seq                | hg19   | fibroblast cell line | induced myocytes D11           | Cao lab         | GSE78096    | 36649              |
| H3K27ac      | ChIP-seq                | hg19   | heart                | fetal 12w post-gest.           | Guo lab         | GSE63634    | 49185              |
| H3K27ac      | ChIP-seq                | hg19   | iPSC                 | induced myocytes               | Sakabe lab      | GSE77267    | 19528              |
| H3K27ac      | ChIP-seq                | hg19   | left ventricle       | adult                          | Ren lab         | GSE16256    | 59070              |
| H3K27ac      | ChIP-seq                | hg19   | limbs                | gest. E33                      | Cotney lab      | GSE42413    | 72841              |
| H3K27ac      | ChIP-seq                | hg19   | limbs                | gest. E41                      | Cotney lab      | GSE42413    | 42284              |
| H3K27ac      | ChIP-seq                | hg19   | limbs                | gest. E44                      | Cotney lab      | GSE42413    | 69409              |
| H3K27ac      | ChIP-seq                | hg19   | limbs                | gest. E47                      | Cotney lab      | GSE42413    | 54981              |
| H3K27ac      | ChIP-seq                | hg19   | liver                | fetal 12w post-gest.           | Guo lab         | GSE63634    | 27741              |
| H3K27ac      | ChIP-seq                | hg19   | right ventricle      | adult                          | Ren lab         | GSE16256    | 126802             |
| H3K27me3     | ChIP-seq                | hg19   | brain                | fetal 12w post-gest.           | Guo lab         | GSE63634    | 50180              |
| H3K27me3     | ChIP-seq                | hg19   | fibroblast cell line | induced myocytes D6            | Cao lab         | GSE78096    | 275                |
| H3K27me3     | ChIP-seq                | hg19   | fibroblast cell line | induced myocytes D11           | Cao lab         | GSE78096    | 173                |
| H3K27me3     | ChIP-seq                | hg19   | heart                | fetal 12w post-gest.           | Guo lab         | GSE63634    | 34795              |
| H3K27me3     | ChIP-seq                | hg19   | hESC                 | induced myocytes 14d           | Murry lab       | SRR577565   | 86945              |
| H3K27me3     | ChIP-seq                | hg19   | iPSC                 | induced myocytes               | Sakabe lab      | GSE77267    | 8952               |
| H3K27me3     | ChIP-seq                | hg19   | liver                | fetal 12w post-gest.           | Guo lab         | GSE63634    | 41712              |
| H3K36me3     | ChIP-seq                | hg19   | hESC                 | induced myocytes 14d           | Murry lab       | SRR577574   | 118126             |
| H3K4me1      | ChIP-seq                | hg19   | brain                | fetal 12w post-gest.           | Guo lab         | GSE63634    | 58426              |
| H3K4me1      | ChIP-seq                | hg19   | heart                | fetal (d105)                   | BROAD institute | GSE17312    | 113536             |
| H3K4me1      | ChIP-seq                | hg19   | heart                | fetal 12w post-gest.           | Guo lab         | GSE63634    | 59026              |
| H3K4me1      | ChIP-seq                | hg19   | iPSC                 | induced myocytes               | Sakabe lab      | GSE77267    | 13902              |
| H3K4me1      | ChIP-seq                | hg19   | liver                | fetal 12w post-gest.           | Guo lab         | GSE63634    | 43426              |
| H3K4me3      | ChIP-seq                | hg19   | brain                | fetal 12w post-gest.           | Guo lab         | GSE63634    | 16745              |
| H3K4me3      | ChIP-seq                | hg19   | fibroblast cell line | induced myocytes D6            | Cao lab         | GSE78096    | 18720              |
| H3K4me3      | ChIP-seq                | hg19   | fibroblast cell line | induced myocytes D11           | Cao lab         | GSE78096    | 19871              |
| H3K4me3      | ChIP-seq                | hg19   | HCM cells            | cell line                      | ENCODE          | GSE35583    | 49247              |
| H3K4me3      | ChIP-seq                | hg19   | heart                | fetal (d105)                   | BROAD institute | GSE17312    | 1238               |
| H3K4me3      | ChIP-seq                | hg19   | heart                | fetal 12w post-gest.           | Guo lab         | GSE63634    | 86937              |
| H3K4me3      | ChIP-seq                | hg19   | hESC                 | induced myocytes 14d           | Murry lab       | SRR577568   | 26960              |
| H3K4me3      | ChIP-seq                | hg19   | iPSC                 | induced myocytes               | Sakabe lab      | GSE77267    | 10760              |
| H3K4me3      | ChIP-seq                | hg19   | liver                | fetal 12w post-gest.           | Guo lab         | GSE63634    | 11799              |
| H3K9ac       | ChIP-seq                | hg19   | heart                | fetal (d105)                   | BROAD institute | GSE17312    | 49876              |
| p300         | ChIP-seq                | hg19   | cortex               | fetal (gest. week 20)          | Pennacchio lab  | GSE42881    | 642876             |
| p300         | ChIP-seq                | hg19   | heart                | adult                          | Pennacchio lab  | GSE32587    | 139824             |
| p300         | ChIP-seq                | hg19   | heart                | fetal (gest. week 16)          | Pennacchio lab  | GSE32587    | 108384             |
| Pol2         | ChIP-seq                | hg19   | heart                | fetal (gest. week 16)          | Pennacchio lab  | GSE32587    | 223086             |
| Pol2         | ChIP-seq                | hg19   | iPSC                 | induced myocytes               | Sakabe lab      | GSE77267    | 11332              |
| ATAC         | ATAC-seq                | hg19   | SANLPCs              | induced SAN myocytes           | Protze lab      | unpublished | 45389              |
| ATAC         | ATAC-seq                | hg19   | hESC                 | 0d H1 differentiated myocytes  | Snyder lab      | GSE85330    | 54378              |
| ATAC         | ATAC-seq                | hg19   | hESC                 | 2d H1 differentiated myocytes  | Snyder lab      | GSE85330    | 21979              |
| ATAC         | ATAC-seq                | hg19   | hESC                 | 4d H1 differentiated myocytes  | Snyder lab      | GSE85330    | 28991              |
| ATAC         | ATAC-seq                | hg19   | hESC                 | 30d H1 differentiated myocytes | Snyder lab      | GSE85330    | 11931              |
| ATAC         | ATAC-seq                | hg19   | hESC                 | 0d H9 differentiated myocytes  | Snyder lab      | GSE85330    | 28417              |
| ATAC         | ATAC-seq                | hg19   | hESC                 | 2d H9 differentiated myocytes  | Snyder lab      | GSE85330    | 10980              |
| ATAC         | ATAC-seq                | hg19   | hESC                 | 4d H9 differentiated myocytes  | Snyder lab      | GSE85330    | 26580              |
| ATAC         | ATAC-seq                | hg19   | hESC                 | 30d H9 differentiated myocytes | Snyder lab      | GSE85330    | 24661              |
| ATAC         | ATAC-seq                | hg19   | iPSC                 | 0d C15 induced myocytes        | Snyder lab      | GSE85330    | 37100              |
| ATAC         | ATAC-seq                | hg19   | iPSC                 | 2d C15 induced myocytes        | Snyder lab      | GSE85330    | 35192              |
| ATAC         | ATAC-seq                | hg19   | iPSC                 | 4d C15 induced myocytes        | Snyder lab      | GSE85330    | 13920              |
| ATAC         | ATAC-seq                | hg19   | iPSC                 | 30d C15 induced myocytes       | Snyder lab      | GSE85330    | 16191              |
| ATAC         | ATAC-seq                | hg19   | iPSC                 | 0d C20 induced myocytes        | Snyder lab      | GSE85330    | 27217              |
| ATAC         | ATAC-seq                | hg19   | iPSC                 | 2d C20 induced myocytes        | Snyder lab      | GSE85330    | 22065              |
| ATAC         | ATAC-seq                | hg19   | iPSC                 | 4d C20 induced myocytes        | Snyder lab      | GSE85330    | 51994              |
| ATAC         | ATAC-seq                | hg19   | iPSC                 | 30d C20 induced myocytes       | Snyder lab      | GSE85330    | 19602              |
| ATAC         | ATAC-seq                | hg19   | hESC                 | cardiac mesoderm H7            | Weissman lab    | GSE85066    | 180380             |
| ATAC         | ATAC-seq                | hg19   | hiPSC-derived VLCM   | induced LV myocytes            | Protze lab      | unpublished | 38335              |
| ATAC         | ATAC-seq                | hg19   | left atrium          | adult                          | Martin lab      | unpublished | 55045              |
| DHSs         | Dnase1 hypersensitivity | hg19   | limbs                | fetal                          | ENCODE          | GSE90405    | 95652              |
| Med1         | ChIP-seq                | hg19   | iPSC                 | induced myocytes 32d           | Srivastava lab  | GSE85631    | 15400              |

\*number of ultra-conserved phastCons (score≥600)

**Supplemental Table 1. b** Human functional genomic datasets included in merge as possible predictors

|                | <i>Scn5a</i> <sup>Δ7</sup><br>at E10.5 | ΔRE6-8<br>at E13.5 | ΔRE6-9<br>at E10.5 | ΔRE6-9<br>at E13.5 | ΔRE6-9<br>at p7 |
|----------------|----------------------------------------|--------------------|--------------------|--------------------|-----------------|
| WT             | 6                                      | 13                 | 16                 | 13                 | 6               |
| Heterozygotes  | 24                                     | 27                 | 41                 | 29                 | 12              |
| Homozygotes    | 8                                      | 12                 | 12                 | 13                 | 0               |
| χ <sup>2</sup> | 2.842                                  | 0.115              | 3.909              | 0.164              | 6.000           |
| <i>P</i>       | 0.241                                  | 0.994              | 0.142              | 0.921              | 0.050           |

|                | <i>Scn5a</i> <sup>Δ7/ΔRE6-9</sup><br>(A)<br>at E10.5 | <i>Scn5a</i> <sup>Δ7/ΔRE6-9</sup><br>(B)<br>at E10.5 |
|----------------|------------------------------------------------------|------------------------------------------------------|
| WT             | 24                                                   | 19                                                   |
| Heterozygotes  | 40                                                   | 40                                                   |
| Homozygotes    | 0                                                    | 0                                                    |
| χ <sup>2</sup> | 22.000                                               | 19.712                                               |
| <i>P</i>       | <0.050                                               | <0.050                                               |

**Supplementary Table 2.** Overview of mice born from heterozygote crosses.

| <b>TALEN</b> | <b>Genomic location (mm9)</b> | <b>RVD sequence</b>                                                                       |
|--------------|-------------------------------|-------------------------------------------------------------------------------------------|
| TAL1         | chr9: 119469416 - 119469431   | HD NI NH HD HD HD HD NG NG HD HD NI HD HD HD                                              |
| TAL2         | chr9: 119469385 - 119469400   | NI HD HD NI NI NI NI NG HD NG NG HD NI HD NI                                              |
| TAL3         | chr9: 119374922 - 119374937   | NI NH HD NG NH NI HD NH HD NG NG NH NG NH NH                                              |
| TAL4         | chr9: 119374891 - 119374907   | NH NI NH NG NG HD HD NG HD NG NI NH NH NH NH NG HD                                        |
| TAL5         | chr9: 119392340 - 119392359   | NH NH NH NI NI NG NH NI HD NG NG HD NI NH NH NG NG NH NG HD                               |
| TAL6         | chr9: 119392305 - 119392324   | NH HD HD NG NH NI NH HD HD NG HD NG NH HD NG NG HD HD NH NH                               |
| TAL7         | chr9: 119388720 - 119388748   | NH HD HD NI HD HD HD NI NH NI HD HD HD HD NI NH HD HD NG NI NI HD HD HD HD HD NI NG NG NG |
| TAL8         | chr9: 119388765 - 119388785   | NG NG NH NG NI HD HD NG NI NI NG NI NI NI NI NG NH NG HD NI                               |

| <b>CRISPR</b> | <b>Genomic location (mm9)</b> | <b>Sequence</b>      |
|---------------|-------------------------------|----------------------|
| CRISPR1       | chr9: 119377940               | GGTCTGAGTACCGTAGATGA |
| CRISPR2       | chr9: 119380243               | GGCACTATTTGAGTTCCACT |
| CRISPR3       | chr9: 119390183               | GGGAGCCGAGGGCGCTCCTT |

**Supplementary Table 3.** TALEN location and RVD sequences, and CRISPR location and sequences for all transgenic mouse models.

| <b>qPCR primers</b> | <b>Sequence 5' to 3'</b>                                           |
|---------------------|--------------------------------------------------------------------|
| <i>Scn5a</i>        | Forward: GGGACTCATTGCCTACATGA<br>Reverse: GCACTGGGAGGTTATCACTG     |
| <i>Scn10a</i>       | Forward: CTAGTCTGTTGTTTTCTGCG<br>Reverse: GCGAAGAGCAGCGTGCGAATC    |
| <i>Exog</i>         | Forward: GTCGTGAGCTGACGGAGAGAT<br>Reverse: CGAGCCAGGATCACCTTGTAAT  |
| <i>Xylb</i>         | Forward: CGGGAGGAGCATCTACAATAA<br>Reverse: CATGAAAAGCTCGGTATGCGGA  |
| <i>Acaa1a</i>       | Forward: TGTGGCTGAGCGGTTTGGCATT<br>Reverse: TGTCACCCTTGTCATCCAGGAC |
| <i>Acaa1b</i>       | Forward: CCTTGGGGTCCTGAGGTCCTAT<br>Reverse: CCTAACTTCTCCACACAGTAGA |
| <i>Myd88</i>        | Forward: CCGCATGGTGGTGGTTGTTTCT<br>Reverse: GGAATCAGTCGTTCTGTTGGA  |
| <i>Oxsr1</i>        | Forward: GAGAGATACAGCAGAGGGTGT<br>Reverse: CACCAGATGCCAGTTTAAAAGT  |
| <i>Osr1</i>         | Forward: CACTGATGAGCGACCTTACA<br>Reverse: CCCACACTCTTGACACTTGAAA   |
| <i>Slc22a13</i>     | Forward: AGACCCTGAAGGACACCCTCCA<br>Reverse: CACCCTCACACTGGAAGTTCTT |
| <i>Slc22a14</i>     | Forward: CTCCGTGACAGCATAGAGTACA<br>Reverse: CACTTCAGAATCAGCCACAATG |
| <i>Dlec1</i>        | Forward: AGCCAGGGAGGATCATGCGTTT<br>Reverse: CCACCACAGTGTAGATTCATA  |
| <i>Plcd1</i>        | Forward: GCCGTCAGACAGCAGTTATTAC<br>Reverse: AGGAGTCATAATCCTCTACCAT |
| <i>Vill</i>         | Forward: ACAGCCAGTCCTACGAGGAGAT<br>Reverse: GGTGACCTGCCTGTTATCACT  |
| <i>Acvr2b</i>       | Forward: TGGACATCCATGAGGACCCG<br>Reverse: GTTCACTCTGCCACGACTGC     |
| <i>Wdr48</i>        | Forward: ATGAGAGTGACTGCTTCGCT<br>Reverse: CCCCACTCACATGGTTCACTT    |
| <i>Scn11a</i>       | Forward: GCCAGCCCAACGAAGTGAA<br>Reverse: TGTTCTCCAAGCCAGAAACCA     |
| <i>Gorasp1</i>      | Forward: TTGGGTTCCAGGCAGAGTGA<br>Reverse: GGGCACACGCTTATGTTGC      |
| <i>cTnI</i>         | Forward: TCGGGTGGACAAAGTGGATG<br>Reverse: AAAGTTGCCACGGAGGTCAT     |
| <i>Hprt</i>         | Forward: TGTTGGATATGCCCTTGACT<br>Reverse: GATTCAACTTGCGCTCATCT     |
| <i>Eef1e1</i>       | Forward: TCCAGTAAAGAAGACACCCAG<br>Reverse: GACAAAACCAGCGAGACACA    |
| <i>Tnnt2</i>        | Forward: TTCGACCTGCAGGAAAAGTT<br>Reverse: CTTCCCACGAGTTTTGGAGA     |

**Supplementary Table 4** qPCR primers sequences.



| vpname            | nReads  | nMapped | nMappedCis | nMappedCisperc | Reads  | cisReads | percCis | cisReads.nTop | percCis.nTop | Captures | cisCaptures | topPct | capt100Kb | cov100Kb | capt1Mb | cov1Mb |
|-------------------|---------|---------|------------|----------------|--------|----------|---------|---------------|--------------|----------|-------------|--------|-----------|----------|---------|--------|
| Scn5a_P1_2_WT1    | 923567  | 850745  | 489669     | 57.56          | 733994 | 471819   | 64.28   | 216403        | 45.37        | 34737    | 10762       | 54.13  | 71.26     | 40.37    | 33.16   | 61.36  |
| Scn5a_P1_2_WT2    | 800213  | 743394  | 523278     | 70.39          | 682917 | 515267   | 75.45   | 110269        | 40.02        | 28436    | 8722        | 78.6   | 65.2      | 44.66    | 28.68   | 64.83  |
| Scn5a_P1_2_WT3    | 421983  | 380629  | 218668     | 57.45          | 330503 | 211534   | 64      | 90059         | 43.27        | 26733    | 8295        | 57.43  | 59.36     | 40.51    | 25.49   | 60.49  |
| Scn5a_P1_2_del1   | 1175210 | 1083775 | 742011     | 68.47          | 938381 | 703689   | 74.99   | 463086        | 66.46        | 52110    | 26363       | 34.19  | 74.67     | 32.45    | 47.76   | 52.16  |
| Scn5a_P1_2_del2   | 981222  | 903112  | 621741     | 68.84          | 788718 | 592060   | 75.07   | 372880        | 65.59        | 45283    | 23473       | 37.02  | 75.66     | 32.38    | 46.01   | 52.24  |
| Scn5a_P1_2_del3   | 732917  | 674346  | 460840     | 68.34          | 585410 | 438292   | 74.87   | 284416        | 66.03        | 41178    | 21597       | 35.11  | 71.48     | 32.69    | 43.8    | 52.3   |
| Scn5a_P1_2_liver1 | 720128  | 656658  | 415523     | 63.28          | 584293 | 406338   | 69.54   | 112229        | 38.94        | 43804    | 8594        | 72.38  | 66.41     | 43.05    | 26.82   | 64.27  |
| Scn5a_P1_2_liver2 | 847913  | 771881  | 455322     | 58.99          | 669697 | 440749   | 65.81   | 178922        | 44.06        | 43053    | 11193       | 59.41  | 70.04     | 39.43    | 32.71   | 61.39  |
| Scn5a_P1_2_liver3 | 896322  | 824211  | 492942     | 59.81          | 719216 | 477303   | 66.36   | 185101        | 43.48        | 44689    | 12986       | 61.22  | 72.8      | 40.1     | 35.41   | 61.78  |
| Scn5a_enh_WT1     | 558262  | 512843  | 224611     | 43.8           | 404797 | 206939   | 51.12   | 201786        | 50.84        | 31561    | 10427       | 2.49   | 80.49     | 47.76    | 32.67   | 62.46  |
| Scn5a_enh_WT2     | 284442  | 260897  | 117662     | 45.1           | 204559 | 108739   | 53.16   | 104156        | 52.45        | 25732    | 8563        | 4.21   | 73.8      | 51.46    | 27.91   | 65.04  |
| Scn5a_enh_WT3     | 136891  | 123426  | 53126      | 43.04          | 95209  | 48710    | 51.16   | 46860         | 50.31        | 20062    | 6620        | 3.8    | 63.1      | 50.72    | 22.43   | 64.06  |
| Scn5a_enh_del1    | 690824  | 637769  | 411998     | 64.6           | 524911 | 382411   | 72.85   | 374671        | 72.56        | 48604    | 27123       | 2.02   | 81.94     | 38.34    | 49.34   | 53.26  |
| Scn5a_enh_del2    | 785692  | 726629  | 470061     | 64.69          | 598942 | 436597   | 72.89   | 426611        | 72.54        | 42852    | 24087       | 2.29   | 79.26     | 38.82    | 47.71   | 53.73  |
| Scn5a_enh_del3    | 749894  | 689277  | 440080     | 63.85          | 563553 | 406920   | 72.21   | 399145        | 71.93        | 41748    | 23312       | 1.91   | 81.49     | 37.88    | 47.6    | 52.91  |
| Scn5a_enh_liver1  | 259380  | 237014  | 104648     | 44.15          | 188262 | 96557    | 51.29   | 91533         | 50.14        | 21734    | 7128        | 5.2    | 71.91     | 50.49    | 26.06   | 65.83  |
| Scn5a_enh_liver2  | 554362  | 510804  | 222341     | 43.53          | 400269 | 204179   | 51.01   | 198184        | 50.37        | 31295    | 10558       | 2.94   | 77.15     | 45.62    | 32.64   | 61.87  |
| Scn5a_enh_liver3  | 450943  | 413532  | 177470     | 42.92          | 326340 | 163957   | 50.24   | 159266        | 49.82        | 36693    | 12039       | 2.86   | 79.49     | 45.32    | 35.18   | 60.97  |

Supplementary Table 5. Stats report on 4C-seq analysis of whole hearts from 8-week old heterozygous RE6-9 and wildtype mice, and liver from 8-week old wildtype mice.

## References

1. Visel A, Minovitsky S, Dubchak I, Pennacchio LA. VISTA Enhancer Browser--a database of tissue-specific human enhancers. *Nucleic Acids Res* **35**, D88-92 (2007).
2. van Duijvenboden K, de Boer BA, Capon N, Ruijter JM, Christoffels VM. EMERGE: a flexible modelling framework to predict genomic regulatory elements from genomic signatures. *Nucleic Acids Res* **44**, (2015).
